# Supplementary material for: Interpretation of health news items reported with or without spin: protocol for a prospective meta-analysis of 16 randomised controlled trials
Source: PubMed Central journal article supplement — BMJ Open. 2017 Nov 17;7(11):e017425. doi: 10.1136/bmjopen-2017-017425 (PMC5702017; doi:10.1136/bmjopen-2017-017425), 2017-11-17
Supplement: bmjopen-2017-017425.draft_revisions.pdf [file bmjopen-2017-017425.draft_revisions.pdf]

# BMJ Open

BMJ Open is committed to open peer review. As part of this commitment we make the peer review history of every article we publish publicly available.

When an article is published we post the peer reviewers' comments and the authors' responses online. We also post the versions of the paper that were used during peer review. These are the versions that the peer review comments apply to.

The versions of the paper that follow are the versions that were submitted during the peer review process. They are not the versions of record or the final published versions. They should not be cited or distributed as the published version of this manuscript.

BMJ Open is an open access journal and the full, final, typeset and author-corrected version of record of the manuscript is available on our site with no access controls, subscription charges or pay-per-view fees (<http://bmjopen.bmj.com>).

If you have any questions on BMJ Open's open peer review process please email [editorial.bmjopen@bmj.com](mailto:editorial.bmjopen@bmj.com)

# BMJ Open

## Interpretation of health news items reported with or without spin: A prospective meta-analysis of 16 randomized controlled trials

|                                 |                                                                                                                                                                                                                                                                                                                                                                                                                                                                                                                                                                                                                                                                                                                                                                                                                                                                                                                                                                                                                                                   |
|---------------------------------|---------------------------------------------------------------------------------------------------------------------------------------------------------------------------------------------------------------------------------------------------------------------------------------------------------------------------------------------------------------------------------------------------------------------------------------------------------------------------------------------------------------------------------------------------------------------------------------------------------------------------------------------------------------------------------------------------------------------------------------------------------------------------------------------------------------------------------------------------------------------------------------------------------------------------------------------------------------------------------------------------------------------------------------------------|
| Journal:                        | <i>BMJ Open</i>                                                                                                                                                                                                                                                                                                                                                                                                                                                                                                                                                                                                                                                                                                                                                                                                                                                                                                                                                                                                                                   |
| Manuscript ID                   | bmjopen-2017-017425                                                                                                                                                                                                                                                                                                                                                                                                                                                                                                                                                                                                                                                                                                                                                                                                                                                                                                                                                                                                                               |
| Article Type:                   | Protocol                                                                                                                                                                                                                                                                                                                                                                                                                                                                                                                                                                                                                                                                                                                                                                                                                                                                                                                                                                                                                                          |
| Date Submitted by the Author:   | 21-Apr-2017                                                                                                                                                                                                                                                                                                                                                                                                                                                                                                                                                                                                                                                                                                                                                                                                                                                                                                                                                                                                                                       |
| Complete List of Authors:       | HANEEF, Romana; INSERM UMR 1153, Center of Research in Epidemiology and Statistics Sorbonne Paris Cité, Center of Epidemiology and Clinical Research; Universite Paris Descartes Faculte de Medecine<br>Yavchitz, Amelie; INSERM, UMR 1153, Epidemiology and Biostatistics Sorbonne Paris Cité Center (CRESS), METHODS team; French Cochrane Center<br>Ravaud, Philippe; INSERM, UMR 1153, Epidemiology and Biostatistics Sorbonne Paris Cité Center (CRESS), METHODS team; Centre d'Épidémiologie Clinique, AP-HP (Assistance Publique des Hôpitaux de Paris), Hôpital Hôtel Dieu<br>Baron, Gabriel; Centre d'Épidémiologie Clinique, AP-HP (Assistance Publique des Hôpitaux de Paris), Hôpital Hôtel Dieu<br>Oranksy, Ivan; New York University's Arthur Carter Journalism Institute<br>Schwitzer, Gary; University of Minnesota, School of Public Health<br>Boutron, Isabelle; Université Paris Descartes, Centre d'Épidémiologie clinique; INSERM, UMR 1153, Epidemiology and Biostatistics Sorbonne Paris Cité Center (CRESS), METHODS team |
| <b>Primary Subject Heading</b>: | Research methods                                                                                                                                                                                                                                                                                                                                                                                                                                                                                                                                                                                                                                                                                                                                                                                                                                                                                                                                                                                                                                  |
| Secondary Subject Heading:      | Public health, Communication                                                                                                                                                                                                                                                                                                                                                                                                                                                                                                                                                                                                                                                                                                                                                                                                                                                                                                                                                                                                                      |
| Keywords:                       | Spin, Meta-analysis, Randomized controlled trials, Health News, Patients, General public                                                                                                                                                                                                                                                                                                                                                                                                                                                                                                                                                                                                                                                                                                                                                                                                                                                                                                                                                          |
|                                 |                                                                                                                                                                                                                                                                                                                                                                                                                                                                                                                                                                                                                                                                                                                                                                                                                                                                                                                                                                                                                                                   |

SCHOLARONE™  
Manuscripts

1  
2  
3  
4  
5  
6  
7  
8  
9  
10  
11  
12  
13  
14  
15  
16  
17  
18  
19  
20  
21  
22  
23  
24  
25  
26  
27  
28  
29  
30  
31  
32  
33  
34  
35  
36  
37  
38  
39  
40  
41  
42  
43  
44  
45  
46  
47  
48  
49  
50  
51  
52  
53  
54  
55  
56  
57  
58  
59  
60

# Interpretation of health news items reported with or without spin: A prospective meta-analysis of 16 randomized controlled trials

Romana HANEEF (1,2,3), Amélie YAVCHITZ (1,3,4), Philippe RAVAUD (1,2,3,4,5), Gabriel BARON (3), Ivan ORANSKY (6), Gary SCHWITZER (7), Isabelle BOUTRON\* (1,2,3,4)

(1) INSERM, UMR 1153, Epidemiology and Biostatistics Sorbonne Paris Cité Center (CRESS), METHODS team, Paris, France

(2) Paris Descartes University, Sorbonne Paris Cité, Faculté de Médecine, Paris, France

(3) Centre d'Épidémiologie Clinique, AP-HP (Assistance Publique des Hôpitaux de Paris), Hôpital Hôtel Dieu, Paris, France

(4) French Cochrane Center, Paris, France

(5) Department of Epidemiology, Columbia University Mailman School of Public Health, New York, NY, USA

(6) New York University's Arthur Carter Journalism Institute, New York, USA

(7) University of Minnesota, School of Public Health, Minnesota, USA

\*Corresponding author:

Isabelle BOUTRON

Centre d'Epidémiologie Clinique

Hôpital Hôtel Dieu,

1, Place du parvis Notre Dame

75004 Paris Cedex 4

E-mail : [isabelle.boutron@aphp.fr](mailto:isabelle.boutron@aphp.fr)

Tel : 00 33 1 42 34 78 33

Fax : 00 33 1 42 34 87 90

## ABSTRACT

**Introduction:** We aim to compare the interpretation of health news items reported with or without spin. “Spin” is defined as a misrepresentation of study results, regardless of motive (intentionally or unintentionally) that overemphasizes the beneficial effects of the intervention and overstates safety compared to that shown by the results.

**Methods and analysis:** We have planned a series of 16 RCTs to perform a prospective meta-analysis. We will select a sample of health news items reporting the results of 4 types of study designs, evaluating the effect of pharmacologic treatment and containing the highest amount of spin in the headline and text. News items reporting 4 types of studies will be included: 1) pre-clinical studies, 2) phase I/II (non-randomized) trials, 3) randomized controlled trials (RCTs), 4) observational studies. We will rewrite the selected news items and remove the spin. The original news and rewritten news will be appraised by 4 types of populations: 1) French-speaking patients, 2) French-speaking general public, 3) English-speaking patients, and 4) English-speaking general public. Each RCT will explore the interpretation of news items reporting one of the 4 study designs by each type of population and will include a sample size of 300 participants. The primary outcome will be participants’ interpretation of the benefit of treatment after reading the news items: (*What do you think is the probability that treatment X would be beneficial to patients? (scale, 0 [very unlikely] to 10 [very likely])*).

This study will evaluate the impact of spin on the interpretation of health news reporting results of studies by patients and the general public.

**Ethics and dissemination:** This study has obtained ethics approval from the Institutional Review Board of INSERM, (registration No IRB00003888). The description of all the steps and the results of this prospective meta-analysis will be available online.

**Registration number:** CRD42017058941

### Strengths and limitations of this study

- This will be the first prospective meta-analysis of randomized controlled trials for interpretation of health news items reporting the results of studies with or without spin.
- It will address the impact of spin on the interpretation of health news by patients and the general public.
- The involvement of patients and the public may help to improve the reporting of medical research in health news.
- News stories are only one way that the public hears news about health.
- Logistically, the recruitment of large number of participants at the same time may be a challenge, but to manage this, participants will be recruited separately for each trial.

review only

## INTRODUCTION

Health news is an important way to communicate updates about medical research to the public. News items reporting the results of medical research attract a large audience [1]. However, the quality of reporting in health news is uneven. The merits of a wide range of treatments and tests are overplayed, and harms are underplayed [2]. Several studies have shown the presence of spin (i.e., distorted presentation of study results) in health news [3-10]. Distorted facts can be misleading and can affect the behaviour of physicians, healthcare providers and patients [11-12]. However, little research has assessed whether spin can affect readers' interpretation [13]. To our knowledge, no work has assessed that news items reported with spin can influence readers' interpretations.

Our hypothesis is that spin can influence the reader's interpretation of health news items. We aim to compare the interpretation of health news items reported with or without spin. We will focus on news items reporting studies evaluating the effect of a pharmacological treatment, containing the largest amount of spin in the headline and text, and receiving high levels of public attention online.

## METHODS

### Definition of “spin”

We define “spin” as a misrepresentation of study results, regardless of motive (intentionally or unintentionally) that overemphasizes the beneficial effects of the intervention and overstates safety compared to that shown by the results [14].

### Study design

We have planned a series of 16 randomized controlled trials (RCTs) to perform a prospective meta-analysis (MA), and a comparing the interpretation of health news items reported with or without spin. Each RCT will explore the interpretation of news items reporting one of 4 study designs: 1) pre-clinical studies, 2) phase I/II trials (non-randomized), 3) RCTs, and 4) observational studies. The news items reporting each study design will be assessed by 4 different targeted populations: 1) French-speaking patients, 2) French-speaking general public, 3) English-speaking patients, and 4) English-speaking general public. Each RCT will be a parallel group with two-arms. In each RCT, participants will be randomly assigned to appraise health news items reported with or without spin (*see figure 1*).

The planning, implementation, analysis and writing of this protocol will follow the SPIRIT [15] and PRISMA-P [16] guidelines. This study has obtained ethics approval from the Institutional Review Board of INSERM, (registration No IRB00003888), and the protocol is registered at PROSPERO website (CRD42017058941).

### News items with and without spin

#### *Selection of news items with spin*

News items reporting studies evaluating a pharmacologic treatment that received a great deal of public attention online and contained a large amount of spin in the headline and text will be selected from a sample of news items retrieved from Altmetric Explorer.

#### *Search strategy*

We will search for articles on “PubMed” using the following search strategy: field ((Randomized controlled trial[Publication Type] OR Observational study[Publication Type]) OR Meta-analysis[Publication Type]) OR Randomized[Title/Abstract] OR controlled[Title/Abstract] OR trial[Title/Abstract] OR cross-sectional[Title/Abstract] OR case-control[Title/Abstract] OR cohort[Title/Abstract] OR Meta-analysis[Title/Abstract] OR systematic review[Title/Abstract] AND (has abstract [text] AND ("2014/01/01"[PDAT] : "2014/06/30"[PDAT])). The publication period will be restricted to the first 6 months of 2014 to minimize the risk of recall bias among study participants.

To retrieve relevant news coverage of these articles, we will apply the “PubMed search details” on “Altmetric Explorer”. The Web application Altmetric Explorer provides access to all sources where the published study is mentioned online in the mass media and sorts the items according to the Altmetric score [17]. The Altmetric score is one way to quantify the public attention an article received in online news outlets, blogs and social media (<https://www.altmetric.com/>) (a high Altmetric score = high public attention).

### ***Screening process***

Screening will be performed in two steps: first, one researcher will systematically screen the retrieved Altmetric Explorer citations, which will be sorted from the highest to the lowest Altmetric score (i.e., highest to lowest amount of public attention), and will identify studies evaluating the effect of a pharmacological treatment, regardless of study design and study population (including human and animal/laboratory). For each study fulfilling eligibility criteria, the researcher will retrieve 1) the published article and 2) all related online news items available at Altmetric Explorer.

Second, the researcher will identify the news item with spin in the headline and text by using a standard scheme of spin [10 18]. When several news items have spin in the headline, the researcher will select the news item with the most spin in the text. We will include news items reported by general or medical news outlets or lay press whose target consumers are the general population.

As a quality procedure, a second researcher will confirm the eligibility of all included studies and screen 10% of the excluded studies.

The screening process will be performed sequentially, the studies being sorted from the highest to the lowest Altmetric score (i.e., highest to lowest public attention). We will include the first 40 studies fulfilling the eligibility criteria and relevant 40 news items containing the most spin in the headline and text: 10 reporting pre-clinical studies, 10 reporting phase I/II non-randomized trials, 10 news items reporting RCTs and 10 reporting observational studies.

### ***Identification and description of spin***

We will identify the spin in the headlines and text of selected news items and will classify them according to following 3 categories of spin — misleading reporting, misleading interpretation and misleading extrapolation — that were previously developed [10].

***Misleading reporting*** is defined as incomplete or inadequate reporting of any important information in the context of the research that could be misleading for the reader. This category includes 1) misleading reporting of study design; 2) not reporting study population (if an animal study); 3) selective reporting of outcomes favoring the beneficial effect of the treatment (e.g., statistically significant results for efficacy outcomes or statistically non-significant results for safety outcomes); 4) not reporting adverse events; 5) linguistic spin (i.e., any word or expression emphasizing the beneficial effect of the treatment [19]; 6) not reporting study limitations; 7) not reporting any caution about study design and results, and 8) any other type of misleading reporting not classified under the above section.

***Misleading interpretation*** is defined as an interpretation of the study results in news stories that is not consistent with the results reported in the scientific articles and overestimating the beneficial effect of the treatment. This category includes claiming 1) a beneficial effect of the treatment despite statistically non-significant results; 2) an equivalent effect of the treatment for statistically non-significant results in superiority RCTs; 3) that the treatment is safe for statistically non-significant results despite a lack of power; 4) safety of the treatment despite adverse events reported in the scientific articles; 5) a causal effect (i.e., implies a cause-and-effect relationship between the intervention being assessed and the outcome of interest [20]) despite a non-randomized study design; 6) a beneficial effect of the treatment despite a small



1  
2  
3 sample size; and 7) a beneficial effect despite lack of a comparator as well as 8) focus on p-value  
4 instead of clinical importance; 9) interpretation of relative risk as absolute risk; and 10) any other  
5 type of misleading interpretation not otherwise classified.  
6

7  
8 ***Misleading extrapolation*** is defined as overgeneralization of study results in news stories  
9 to different populations, interventions or outcomes that were not assessed in the study. This  
10 category includes extrapolating 1) animal study results to human application; 2) preliminary  
11 study results to clinical application; 3) the effect of study outcomes to other outcomes for the  
12 disease; 4) the beneficial effect of the study intervention to a different intervention (e.g.,  
13 broccoli, which contains sulphoraphane, was claimed as beneficial by health news items, but the  
14 study evaluated the benefit of a sulphoraphane compound only); and 5) from the study  
15 participants to a larger or different population as well as 6) inappropriate implications for clinical  
16 or daily use (i.e., an improper recommendation or advice to use the intervention in clinical  
17 practice or daily use not supported by study results); and 7) any other types of extrapolation not  
18 otherwise classified.  
19  
20

21  
22 All other spin that could not be classified with this scheme will be systematically recorded and  
23 secondarily classified.  
24  
25

## 26 27 28 **Construction of news without spin**

### 29 30 ***Format of the news items***

31 Our aim is to keep the same context and format of the original news item and conceal the names  
32 of pharmacological treatments, authors and funders to avoid evaluation bias. Consequently, to  
33 rewrite the news items we will:  
34

- 35 1. Keep the same context and structure
- 36 2. Create hypothetical names of reported pharmacological treatments
- 37 3. Conceal the names of study authors and experts by using different names selected based on  
38 the origin of the name from an online list of names including all countries of the world  
39 (<http://www.studentsoftheworld.info/penpals/stats.php3?Pays>) to keep the news content  
40 natural.  
41
- 42 4. Keep the name of the research institute/university/hospital where the study was conducted.
- 43 5. Replace the name of the funding source with standardized terms for profit or non-profit  
44 funding organizations.  
45
- 46 6. Delete the name of the online news outlet, date the news story was published online, name of  
47 the journalist who wrote the news with spin, name of the medical journal in which the study  
48 was published, reference to the original article and trial registration number or name (if  
49 reported).  
50  
51

### 52 53 54 ***Guidelines to remove spin in the news items***

55 To construct health news stories without spin, we will delete the spin identified in the headline  
56 and text and will add some caution, depending on context. The guidelines used to remove the  
57 spin are described in Table 1. The guidelines to add caution are in Table 2.  
58  
59  
60

1  
2  
3  
4 One researcher (RH) will identify and remove the spin in each news item selected (in the  
5 headline and text) and will rewrite the news story without spin, according to the guidelines  
6 described in Tables 1 and 2. Two researchers (IB) and (AY) will check the rewritten news items.  
7 Finally, a sample of the rewritten news stories will be checked by a researcher working in the  
8 field of medical journalism (IO). Appendix 1 provides an example of a news item reported with  
9 and without spin. Our sample of news will contain 80 news items [40 original news items (with  
10 spin) and 40 rewritten news items (without spin)].  
11  
12  
13

### 14 15 **Translation of the news items reported with and without spin**

16 All news items will be translated into French language to be used in RCTs involving French-  
17 speaking participants. One French native speaker researcher (AY) will validate the French  
18 translation of news items. Further, a French medical journalist will also validate the French  
19 translated news items.  
20  
21

### 22 **Population**

23 Each RCT will target one of the four following study populations:  
24  
25

- 26 1. French-speaking patients
- 27 2. French-speaking general public
- 28 3. English-speaking patients
- 29 4. English-speaking general public
- 30
- 31
- 32
- 33
- 34

### 35 **Eligibility criteria**

36 We will enroll participants older than 30 years.  
37

### 38 **Recruitment strategy**

39 To recruit participants, we will contact online communities of patients, patients' associations,  
40 popular health forums, and investigators of e-cohorts. We will also use the online platform  
41 (www.findparticipants.com) which enables access to thousands of interested participants to  
42 participate in research studies worldwide. We will also advertise the study in hospitals and GP  
43 practices.  
44

45 Each participant will provide an online informed consent at the time of enrollment.  
46

47 We will send participants an invitation by email (appendix 2). If respondents agree to participate  
48 in the survey, an Internet link included in the invitation email will give them access to  
49 information regarding the study and a screening question asking them whether they are willing to  
50 participate in the study. If they answer yes, respondents will be randomly assigned to read 1  
51 news item with spin or one news item without spin.  
52

53 Invitation emails will be sent in waves until the planned number of participants log on and  
54 complete the assessment. A maximum of two reminders will be sent to participants.  
55  
56  
57  
58  
59  
60

## Interventions

We will compare the interpretation of “health news items” reported with spin (original news = active comparator) or without spin (rewritten news = experimental group).

## Random assignment

A random assignment sequence will be computer-generated by a statistician by using blocks of 10 (i.e., number of news items selected x 2) for each study design type. The list will not be disclosed to investigators. Allocation concealment will be assured by the use of a computerized random-assignment system. After randomization, participants will be asked to complete a questionnaire. Participants who log on and do not evaluate the news will be excluded and the news item will be automatically allocated to another participant.

## Blinding

Blinding of participants is not possible, but to minimize bias, participants will be blinded to the study hypothesis. All participants will be informed that they are participating in a survey about the interpretation of news reporting medical research that evaluates treatments. They will not be informed about the objectives and hypothesis of the study.

After the completion of study, each participant will be told about the study objectives, hypothesis and results.

## Study outcomes

Our primary outcome will be participants’ interpretation of the benefit of the treatment measured on a scale from 0 to 10.

1. *What do you think is the probability that treatment X would be beneficial to patients? (scale, 0 [very unlikely] to 10 [very likely])*

Secondary outcomes are as follows:

2. *What do you think is the size of the potential benefit for patients? (scale, [none, small, moderate or large])*
3. *How safe do you think that treatment X would be for patients? (scale, 0 [very unlikely] to 10 [very likely])*
4. *Do you think this treatment should be offered to patients in the short term? (scale, 0 [very unlikely] to 10 [very likely])*
5. *Do you think this treatment will make a difference in the existing clinical practice? (scale, 0 [absolutely no] to 10 [absolutely yes])*

## Sample size

Each participant will read a news item with or without spin. We want to assess a mean difference of 1.0 for the primary outcome between groups on a 0-10 scale, with a standard deviation of 2.5 [13]. For each RCT, a sample of 266 assessments of news items will be needed to detect an effect size of 0.4 with a power of 90% and  $\alpha$  risk of 5% for each RCT. Each news item will be read the same number of times (balanced design) and we will take into account clustering due to the fact that a news items will be read many times. To achieve this, we will use a sample size

1  
2  
3 of 300 participants (150 in each group) in each RCT (i.e., an inflation factor of about 1.1).  
4 Therefore, each news item will be assessed 15 times in each group (10 news items with or  
5 without spin for 150 participants) for each RCT.  
6  
7  
8

### 9 10 **Statistical analysis**

11 The statistical analysis will be undertaken by a statistician who will use R v2.15.1 (R foundation  
12 for Statistical Computing, Vienna, Austria) at the Center for Clinical Epidemiology, Paris,  
13 France. All outcomes will be quantitative and the number of participants and news items will be  
14 balanced in each group. For each RCT, the following analysis will be done: The differences  
15 between groups will be analyzed by using a linear mixed model with a fixed group effect and  
16 random group effect and news items–group interaction effects. Random effects will allow us to  
17 account for the following 2 levels of clustering: within-group clustering as a result of the news  
18 (each news item will be assessed 15 times in each group) and between-group clustering (pairing  
19 between the news used in the 2 arms of the trial). Inferences will be based on the restricted  
20 maximum likelihood. This model will compare the mean difference between 2 arms for each  
21 trial. For primary and secondary outcomes, we will estimate the difference between means with  
22 95% confidence intervals (CIs).  $P < 0.05$  will be considered statistically significant.  
23  
24  
25

26  
27 Finally, after analyzing each RCT separately, a prospective meta-analysis will be done to  
28 summarize intervention effects. The mean difference with 95% CIs will be estimated by using a  
29 random-effects model based on the DerSimonian-Laird method. Forest plots will be created for  
30 visual interpretation of results. The heterogeneity will be assessed by  $X^2$  test ( $P < 0.05$ ) and  
31 degree of heterogeneity by the  $I^2$  statistic ( $> 75\%$ ) to assess statistical significance (Higgins JPT  
32 et al, 2014). We will also assess the variance ( $\tau^2$ ) between trials.  
33  
34  
35  
36

### 37 **STUDY DURATION**

38  
39  
40 The total duration of this study will be 24 months. Expected period of inclusion of participants  
41 will also be 24 months and the duration of participation per participant/patient will be 1 hour.  
42 The anticipated start date of trials will be June, 2017.  
43  
44  
45  
46  
47  
48  
49  
50  
51  
52  
53  
54  
55  
56  
57  
58  
59  
60

## MODIFICATIONS MADE IN THE PROTOCOL SUBMITTED TO ETHICAL COMMITTEE

We made following changes in the protocol submitted to the ethical committee:

### Rewriting news items

- Word count: The condition to keep the word count of  $\pm 20\%$  from original news to rewritten news items is deleted.
- Concealment: The name of the research institute/university/hospital where the study was conducted will be kept in the rewritten news items.
- Guidelines to remove spin: We will also report the caution or recommendation by study authors, reported in the related article when available.

### Survey questionnaire

- We merged two questions related to demographic information into one: How often do you read news items? Never/sometimes (once per month)/often(once per week)/daily

### Guidelines

- We report SPIRIT and PRISMA-P guidelines to follow for protocols of clinical trials and meta-analysis respectively.

## DISCUSSION

To best of our knowledge, we present the first prospective meta-analysis of randomized controlled trials for interpretation of health news items reporting the results of studies with or without spin.

We have designed 16 randomized controlled trials which will focus on interpretation of news items reporting results of 4 types of study designs: 1) pre-clinical studies, 2) phase I/II trials (non-randomized), 3) RCTs, and 4) observational studies. There will be 80 news items reporting these study designs (20 new items / study design: 10 original news items with spin + 10 rewritten news items without spin). Each RCT will target one of the 4 types of populations: 1) French-speaking patients, 2) French-speaking general public, 3) English-speaking patients, and 4) English-speaking general public. In total, 4800 participants will be involved in 16 planned RCTs (300 participants/ RCT). Once the planned RCTs are completed, then the results of different RCTs will be included to perform a meta-analysis.

The concept of prospective meta-analysis allows us to compare the interpretation of health news stories reporting results of studies with or without spin by different types of populations. This new form of synthesis of evidence answers the question of whether spin can influence patients' and the public's interpretation of health news.

We will document all practical issues and difficulties encountered to demonstrate that this type of synthesis of evidence is feasible. We are aware of some challenges, such as recruitment of participants. Logistically, the recruitment of large number of participants at the same time may be a challenge, but to manage this, participants will be recruited separately for each trial.

## EXPECTED RESULTS

This study will evaluate the impact of spin on patients' and the public's interpretation of news items reporting results of studies.

### **Acknowledgements**

The authors thank Laura Smales (BioMedEditing, Toronto, Canada) for language revision of this protocol, and the members of New York University's Science, Health and Environmental Reporting Program for their assistance rewriting some of the news items used in this work.

### **Contributors**

RH: Helped with conception of study design, selecting news items, rewriting news items and wrote the draft of the protocol, AY: Helping with validation of rewritten the news items and French translation of selected news items, PR: Conception of study design, GB: Helped to write the statistical analysis, IO: Helped with survey questionnaire and validation of rewritten news items, GS: Helped with survey questionnaire, IB: Conception of study design, validating rewritten news items, and helped to write the draft of the protocol.

All authors read and approved the final protocol.

### **Funding**

None

### **Competing interests**

None declared

### **Data sharing statement**

This article is the protocol of a prospective meta-analysis. The authors plan to report transparently all the planned trials and will provide open access to all extracted data for each trial.

### **Open Access**

This is an Open Access article distributed in accordance with the Creative Commons Attribution Non Commercial (CC BY-NC 4.0) license, which permits others to distribute, remix, adopt, build upon this work non-commercially, and license their derivative works on different terms, provided the original work is properly cited and the use is non-commercial. See: <http://creativecommons.org/licenses/by-nc/4.0/>

## REFERENCES

1. Sharma V, Dowd M, Swanson DS, Slaughter AJ, Simon SD. Influence of the news media on diagnostic testing in the emergency department. *Archives of Pediatrics & Adolescent Medicine* 2003;**157**(3):257-60 doi: 10.1001/archpedi.157.3.257[published Online First: Epub Date]].
2. Richards T, Montori VM, Godlee F, Lapsley P, Paul D. Let the patient revolution begin. *BMJ* 2013;**346** doi: 10.1136/bmj.f2614[published Online First: Epub Date]].
3. Moynihan R, Bero L, Ross-Degnan D, et al. Coverage by the News Media of the Benefits and Risks of Medications. *New England Journal of Medicine* 2000;**342**(22):1645-50 doi: doi:10.1056/NEJM200006013422206[published Online First: Epub Date]].
4. Woloshin S, Schwartz LM. Press releases: Translating research into news. *JAMA* 2002;**287**(21):2856-58 doi: 10.1001/jama.287.21.2856[published Online First: Epub Date]].
5. Schwitzer G. How Do US Journalists Cover Treatments, Tests, Products, and Procedures? An Evaluation of 500 Stories. *PLoS Med* 2008;**5**(5):e95 doi: 10.1371/journal.pmed.0050095[published Online First: Epub Date]].
6. Lancet. Incomplete reporting of research in academic press releases. *The Lancet*;373(9679):1920 doi: [http://dx.doi.org/10.1016/S0140-6736\(09\)61044-8](http://dx.doi.org/10.1016/S0140-6736(09)61044-8)[published Online First: Epub Date]].
7. Schwartz LM, Woloshin S, Andrews A, Stukel TA. Influence of medical journal press releases on the quality of associated newspaper coverage: retrospective cohort study. *BMJ* 2012;**344** doi: 10.1136/bmj.d8164[published Online First: Epub Date]].
8. Yavchitz A, Boutron I, Bafeta A, et al. Misrepresentation of Randomized Controlled Trials in Press Releases and News Coverage: A Cohort Study. *PLoS Med* 2012;**9**(9):e1001308 doi: 10.1371/journal.pmed.1001308[published Online First: Epub Date]].
9. Sumner P, Vivian-Griffiths S, Boivin J, et al. The association between exaggeration in health related science news and academic press releases: retrospective observational study. *BMJ* 2014;**349** doi: 10.1136/bmj.g7015[published Online First: Epub Date]].
10. Haneef R, Lazarus C, Ravaud P, Yavchitz A, Boutron I. Interpretation of Results of Studies Evaluating an Intervention Highlighted in Google Health News: A Cross-Sectional Study of News. *PLoS ONE* 2015;**10**(10):e0140889 doi: 10.1371/journal.pone.0140889[published Online First: Epub Date]].
11. Grilli R, Ramsay C, Minozzi S. Mass media interventions: effects on health services utilisation. *Cochrane Database of Systematic Reviews* 2002; (1). <http://onlinelibrary.wiley.com/doi/10.1002/14651858.CD000389/abstract>.
12. Haas JS, Kaplan CP, Gerstenberger EP, Kerlikowske K. Changes in the Use of Postmenopausal Hormone Therapy after the Publication of Clinical Trial Results. *Annals of Internal Medicine* 2004;**140**(3):184-88 doi: 10.7326/0003-4819-140-3-200402030-00009[published Online First: Epub Date]].
13. Boutron I, Altman DG, Hopewell S, Vera-Badillo F, Tannock I, Ravaud P. Impact of Spin in the Abstracts of Articles Reporting Results of Randomized Controlled Trials in the Field of Cancer: The SPIIN Randomized Controlled Trial. *Journal of Clinical Oncology* 2014;**32**(36):4120-26
14. Boutron I, Dutton S, Ravaud P, Altman DG. REporting and interpretation of randomized controlled trials with statistically nonsignificant results for primary outcomes. *JAMA* 2010;**303**(20):2058-64 doi: 10.1001/jama.2010.651[published Online First: Epub Date]].
15. Chan A-W, Tetzlaff JM, Gøtzsche PC, et al. SPIRIT 2013 explanation and elaboration: guidance for protocols of clinical trials. *BMJ : British Medical Journal* 2013;**346** doi: 10.1136/bmj.e7586[published Online First: Epub Date]].
16. Shamseer L, Moher D, Clarke M, et al. Preferred reporting items for systematic review and meta-analysis protocols (PRISMA-P) 2015: elaboration and explanation. *BMJ : British Medical Journal* 2015;**349** doi: 10.1136/bmj.g7647[published Online First: Epub Date]].
17. Altmetric. <http://www.altmetric.com/about-altmetrics/altmetric-details-page/>. 2012



- 1
  - 2
  - 3
  - 4
  - 5
  - 6
  - 7
  - 8
  - 9
  - 10
  - 11
  - 12
  - 13
  - 14
  - 15
  - 16
  - 17
  - 18
  - 19
  - 20
  - 21
  - 22
  - 23
  - 24
  - 25
  - 26
  - 27
  - 28
  - 29
  - 30
  - 31
  - 32
  - 33
  - 34
  - 35
  - 36
  - 37
  - 38
  - 39
  - 40
  - 41
  - 42
  - 43
  - 44
  - 45
  - 46
  - 47
  - 48
  - 49
  - 50
  - 51
  - 52
  - 53
  - 54
  - 55
  - 56
  - 57
  - 58
  - 59
  - 60
18. Lazarus C, Haneef R, Ravaud P, Boutron I. Classification and prevalence of spin in abstracts of non-randomized studies evaluating an intervention. *BMC Medical Research Methodology* 2015;**15**(1):1-8 doi: 10.1186/s12874-015-0079-x[published Online First: Epub Date].
19. Cummings P, Rivara FP. SPin and boasting in research articles. *Archives of Pediatrics & Adolescent Medicine* 2012;**166**(12):1099-100 doi: 10.1001/archpediatrics.2012.1461[published Online First: Epub Date].
20. Cofield SS, Corona RV, Allison DB. Use of Causal Language in Observational Studies of Obesity and Nutrition. *Obesity Facts* 2010;**3**(6):353-56

For peer review only

1  
2  
3 **Figure 1: Series of 16 RCTs that will be included in the prospective meta-analysis**  
4

5 Each RCT will explore the interpretation of news items reporting 4 study designs: 1) pre-clinical  
6 studies, 2) phase I/II trials (non-randomized), 3) RCTs, and 4) observational studies. Each RCT  
7 will target 4 types of populations: 1) French-speaking patients, 2) French-speaking general  
8 public, 3) English-speaking patients, and 4) English-speaking general public.  
9  
10  
11  
12  
13  
14  
15  
16  
17  
18  
19  
20  
21  
22  
23  
24  
25  
26  
27  
28  
29  
30  
31  
32  
33  
34  
35  
36  
37  
38  
39  
40  
41  
42  
43  
44  
45  
46  
47  
48  
49  
50  
51  
52  
53  
54  
55  
56  
57  
58  
59  
60

For peer review only

**Table 1: Guidelines to remove spin**

| <b>Spin</b>                                                                                                                  | <b>Interventions/modifications</b>                                                                                                                         |
|------------------------------------------------------------------------------------------------------------------------------|------------------------------------------------------------------------------------------------------------------------------------------------------------|
| <b>Spin in headline</b>                                                                                                      | Delete the misleading information and report the appropriate information                                                                                   |
| <b>Spin in text</b>                                                                                                          |                                                                                                                                                            |
| <b><i>Misleading reporting</i></b>                                                                                           |                                                                                                                                                            |
| • Misleading reporting of study design                                                                                       | Report the appropriate study design                                                                                                                        |
| • Not reporting study population if an animal study                                                                          | Report animal study subjects                                                                                                                               |
| • Selective reporting of outcomes                                                                                            | Report the results for all primary outcomes.                                                                                                               |
| • Not reporting adverse events                                                                                               | Report adverse events when higher in one group<br>[We considered reporting more frequent and serious adverse events related to treatment primarily.]       |
| • Use of linguistic spin                                                                                                     | Delete linguistic spin                                                                                                                                     |
| • Not reporting study limitations and caution specific to study design                                                       | Report the study limitations and cautions. The cautions with standardized text are described in table 2.                                                   |
| <b><i>Misleading interpretation</i></b>                                                                                      |                                                                                                                                                            |
| • Claiming a beneficial effect of intervention despite statistically non-significant results                                 | Delete this spin and use the generic wording, such as [Treatment A was not more effective on “primary outcome” than the comparator B in patients with....] |
| • Claiming an equivalent beneficial effect of intervention despite statistically non-significant results in superiority RCTs |                                                                                                                                                            |
| • Claiming the treatment is safe despite statistically non-significant results in treatment and comparison groups            | Delete this spin; reword and provide the appropriate information when needed.                                                                              |
| • Claiming safety despite adverse events                                                                                     |                                                                                                                                                            |
| • Claiming a causal effect despite non-randomized study design                                                               |                                                                                                                                                            |
| • Claiming a beneficial effect despite small sample size not reported                                                        |                                                                                                                                                            |
| • Claiming a beneficial effect despite lack of comparator                                                                    |                                                                                                                                                            |
| • Focus on p-value instead of magnitude of the effect (effect size)                                                          |                                                                                                                                                            |
| <b><i>Misleading extrapolation</i></b>                                                                                       |                                                                                                                                                            |
| • Animal study results to human application                                                                                  | Delete the inappropriate extrapolation                                                                                                                     |
| • Preliminary study results to clinical application                                                                          |                                                                                                                                                            |
| • Study outcomes to other outcomes for the disease                                                                           |                                                                                                                                                            |
| • Study intervention to a different intervention                                                                             |                                                                                                                                                            |
| • Study participants to a larger or different population                                                                     |                                                                                                                                                            |
| • Inappropriate implication for clinical or daily use                                                                        | Delete the statement and clearly report the immediate unavailability in clinical practice                                                                  |
| <b><i>Author's/expert's statement (interview)</i></b>                                                                        |                                                                                                                                                            |
|                                                                                                                              | Delete the spin in the statement                                                                                                                           |
|                                                                                                                              | Report the caution or recommendation by study authors, reported in the relevant article when available.                                                    |

**Table 2: Reporting of cautions with standardized wording**

| Study design                            | Standardized text                                                                                                                                                          |
|-----------------------------------------|----------------------------------------------------------------------------------------------------------------------------------------------------------------------------|
| • Animal or laboratory study            | “The study was based on animals; it is impossible to know whether this treatment will work on humans or not.”                                                              |
| • Small study                           | “These results are based on a small study; larger studies are needed to understand whether the treatment works across a large population.”                                 |
| • Uncontrolled study/Lack of comparator | “Everyone in this study took drug X. Without investigating patients who did not take that drug, it is impossible to know whether taking drug X accounted for the outcome”. |
| • Controlled but not randomized study   | “The study participants were not randomized. We do not know whether it was drug X or something else that really accounted for the effect observed.”                        |
| • Important adverse event               | “The benefit observed should be weighed against the adverse effects (or other downsides such as inconvenience, cost, etc).”                                                |

**Prospective Meta-analysis**  
N = 16 RCTs

**Interpretation of News items reporting results with or without spin**

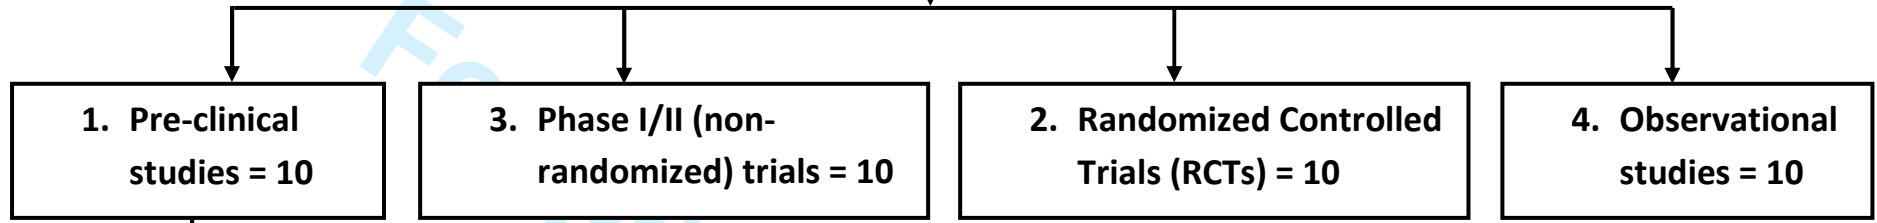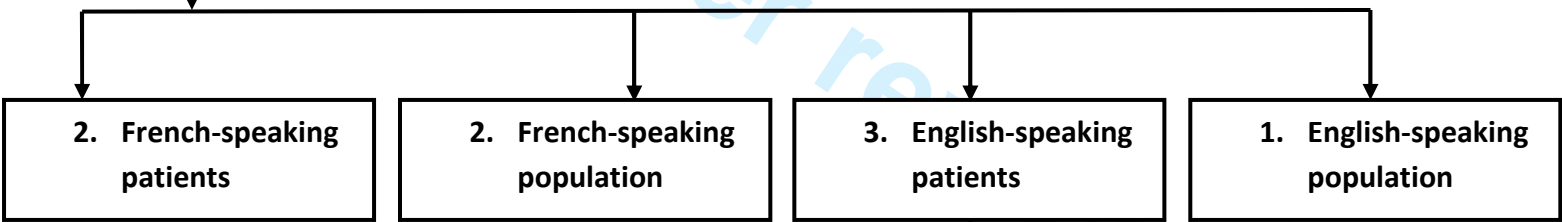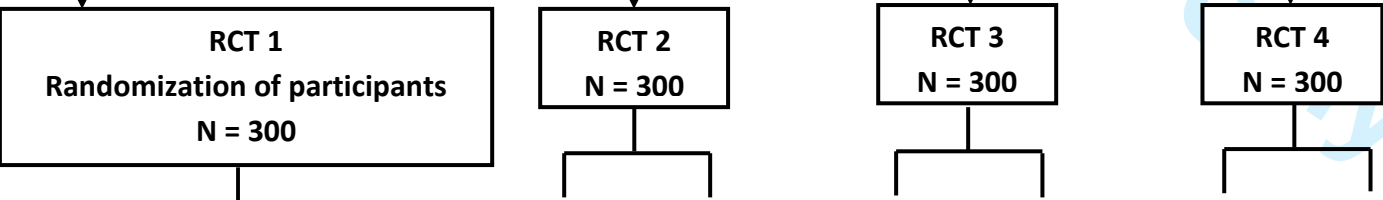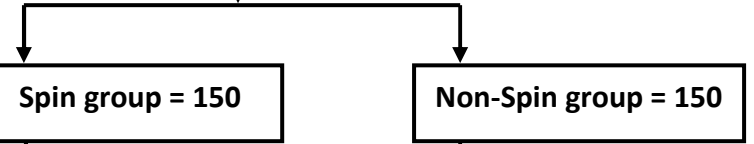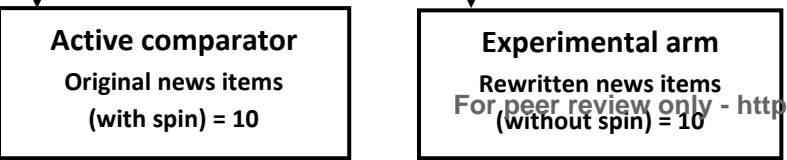

1  
2  
3  
4  
5  
6  
7  
8  
9  
10  
11  
12  
13  
14  
15  
16  
17  
18  
19  
20  
21  
22  
23  
24  
25  
26  
27  
28  
29  
30  
31  
32  
33  
34  
35  
36  
37  
38  
39  
40  
41  
42  
43  
44  
45  
46  
47

## Appendix 1: An example of a news item with and without spin

| Original News (with spin)                                                                                                                                                                                                                                                                                                                                                                                                                                                                                                                                                                                                                                                                                                                                                                                                                                                                                                                                                                                                                                                                                                                                                                                                                                                                                                                                                                                                                                            | Rewritten News (without spin)                                                                                                                                                                                                                                                                                                                                                                                                                                                                                                                                                                                                                                                                                                                                                                                                                                                                                                                                                                                                                                                                                                                                                                                                                                                                                                                                                                                                                                                                                                                                                                                                                                                                                                                                                                                                                                                                                                                                                                                                                                                                                                     |
|----------------------------------------------------------------------------------------------------------------------------------------------------------------------------------------------------------------------------------------------------------------------------------------------------------------------------------------------------------------------------------------------------------------------------------------------------------------------------------------------------------------------------------------------------------------------------------------------------------------------------------------------------------------------------------------------------------------------------------------------------------------------------------------------------------------------------------------------------------------------------------------------------------------------------------------------------------------------------------------------------------------------------------------------------------------------------------------------------------------------------------------------------------------------------------------------------------------------------------------------------------------------------------------------------------------------------------------------------------------------------------------------------------------------------------------------------------------------|-----------------------------------------------------------------------------------------------------------------------------------------------------------------------------------------------------------------------------------------------------------------------------------------------------------------------------------------------------------------------------------------------------------------------------------------------------------------------------------------------------------------------------------------------------------------------------------------------------------------------------------------------------------------------------------------------------------------------------------------------------------------------------------------------------------------------------------------------------------------------------------------------------------------------------------------------------------------------------------------------------------------------------------------------------------------------------------------------------------------------------------------------------------------------------------------------------------------------------------------------------------------------------------------------------------------------------------------------------------------------------------------------------------------------------------------------------------------------------------------------------------------------------------------------------------------------------------------------------------------------------------------------------------------------------------------------------------------------------------------------------------------------------------------------------------------------------------------------------------------------------------------------------------------------------------------------------------------------------------------------------------------------------------------------------------------------------------------------------------------------------------|
| <p data-bbox="174 326 758 354"><b>Now, 'sticky balls' that can prevent cancer spread</b></p> <p data-bbox="174 386 989 448">Researchers have developed cancer-killing "sticky balls," that can destroy tumour cells in the blood and may prevent cancer spread.</p> <p data-bbox="174 451 1010 513">The most dangerous and deadly stage of a tumour is when it spreads around the body.</p> <p data-bbox="174 516 1010 607">Scientists at Cornell University, in the US, have designed nanoparticles that stay in the bloodstream and kill migrating cancer cells on contact, the BBC reported.</p> <p data-bbox="174 610 989 672">They said the impact was "dramatic" but there was "a lot more work to be done".</p> <p data-bbox="174 675 968 766">The team at Cornell attached a cancer-killing protein called Trail, which has already been used in cancer trials, and other sticky proteins to tiny spheres or nanoparticles.</p> <p data-bbox="174 769 989 831">When these sticky spheres were injected into the blood, they latched on to white blood cells.</p> <p data-bbox="174 834 989 951">Tests showed that in the rough and tumble of the bloodstream, the white blood cells would bump into any tumour cells which had broken off the main tumour and were trying to spread. The research showed the resulting contact with the Trail protein then triggered the death of the tumour cells.</p> <p data-bbox="174 984 380 1011">Word count = 169</p> | <p data-bbox="1035 326 1787 354"><b>Now, 'Sticky balls' that can may prevent cancer spread in mice</b></p> <p data-bbox="1035 386 1913 448">Researchers <del>have</del> <b>are</b> developed <del>ing</del> cancer-killing "sticky balls," that <del>can</del> <b>may</b> destroy tumour cells in the blood <b>of mice</b> and <del>may prevent cancer spread</del>.</p> <p data-bbox="1035 451 1913 513">The most dangerous and deadly stage of a tumour is when it spreads around the body.</p> <p data-bbox="1035 516 1913 607">Scientists at Cornell University, in the US, have designed nanoparticles that stay in the bloodstream and <b>may</b> kill migrating cancer cells on contact, the BBC reported.</p> <p data-bbox="1035 610 1913 672"><del>They said the impact was "dramatic" but there was "a lot more work to be done".</del></p> <p data-bbox="1035 675 1913 737"><b>The biomedical engineers tested the new technology in live mice and human blood samples in cell culture.</b></p> <p data-bbox="1035 740 1913 831">The team at Cornell attached a <del>cancer-killing</del> protein called <del>Trail</del> <b>TRAIL</b>, which has already been used in cancer trials and other sticky proteins to tiny spheres or nanoparticles.</p> <p data-bbox="1035 834 1913 896"><del>When these sticky spheres were injected into blood, they latched on to white blood cells.</del></p> <p data-bbox="1035 899 1913 1049">Tests showed that in the rough and tumble of the bloodstream, the white blood cells would bump into any tumour cells which had broken off the main tumour and <del>were trying to spread</del> <b>bind to the TRAIL protein</b>. The research showed the resulting contact with the Trail protein then <b>may</b> <del>triggered</del> <b>result in</b> the death of the tumour cells.</p> <p data-bbox="1035 1052 1913 1143"><b>However, it may take years to know whether this treatment will work for human or not. Indeed, less than 1% of the drugs tested on animals are approved for clinical use in patients.</b></p> <p data-bbox="1035 1175 1241 1203">Word count = 188</p> |

## Appendix 2: Informed consent

### Invitation letter

**Objective:** Interpretation of health news items: an academic study

We invite you to participate in an international academic study to investigate people's understanding of health news items.

The study will require only a minimal amount of work on your part, and you will be helping to improve the reporting/communication of results related to medical research in health news for patients and the public.

Your participation would involve in reading a news item and answering five short questions about the findings in the news item. To avoid any biased interpretation, the description of the treatment and name of the study has been masked.

Your responses will be kept confidential. This study has been approved by INSERM, Institutional Review Board (IRB 00003888).

We will share with you the results of this study upon its completion.

You can complete the survey by XX

Or by copying and pasting the following link into your web browser: XX

With best wishes

Pr Isabelle Boutron (Paris Descartes University, INSERM UMR 1153, France)

Romana Haneef (Paris Descartes University, INSERM UMR 1153, France)

Dr. Amélie Yavchitz (French Cochrane Center, Paris, France)

Pr Philippe Ravaud (Paris Descartes University, INSERM UMR 1153, France)

Mr. Gabriel Baron (Centre d'Épidémiologie Clinique, Hôpital Hôtel-Dieu, Paris, France)

Pr Ivan Oransky (New York University's Arthur Carter Journalism Institute, New York, USA)

Pr Gary Schwitzer (University of Minnesota, School of public health, Minnesota, USA)

If you prefer not to receive future reminders regarding this study, please click here.

1  
2  
3 **Next page**  
4

5 **Please complete some simple information about yourself**  
6  
7

8  
9 Your age:  
10

11 Sex: Female Male  
12

13 Do you have a chronic health condition yes/ no (*according to the answer, the participant will be*  
14 *directed to the survey dedicated to patients or to the public*)  
15

16 Where are you currently located? France/ UK/ Other European country/ USA/ Canada/ South  
17 America/ Asia/ Oceania  
18  
19

20 Do you read health news items? yes/no  
21

22 How many health news items do you read per month?  
23

24 Do you rely on health news items to decide about your health?  
25

26 What is your primary source to obtain information related to new treatments?  
27

28 Physicians/family or friends/online health news/television/social media/other  
29  
30

31  
32 **Submit**  
33  
34  
35  
36  
37  
38  
39  
40  
41  
42  
43  
44  
45  
46  
47  
48  
49  
50  
51  
52  
53  
54  
55  
56  
57  
58  
59  
60



1  
2  
3 Next page  
4  
5  
6

7 **This news item describes a study evaluating a treatment published in a peer-reviewed**  
8 **journal.**  
9

10  
11  
12  
13 **Insertion of the news items**  
14

15  
16  
17 **Based on the information reported in the news, please answer the following questions about**  
18 **the treatment:**  
19

- 20  
21  
22  
23  
24  
25  
26  
27  
28  
29  
30  
31  
32  
33  
34
1. *What do you think is the probability that “treatment X” would be beneficial to patients? (scale, 0 [very unlikely] to 10 [very likely]) (Primary outcome)*
  2. *What do you think is the size of the potential benefit for patients? (scale, [none, small, moderate or large])*
  3. *How safe do you think that this treatment X would be for patients? (scale, 0 [very unlikely] to 10 [very likely])*
  4. *Do you think this treatment should be offered to patients in the short term? (scale, 0 [very unlikely] to 10 [very likely])*
  5. *Do you think this treatment will make a difference in the existing clinical practice? (scale, 0 [absolutely no] to 10 [absolutely yes])*

35 Do you have any comments?

36  
37 Write your comment here ...  
38  
39  
40

41 **Submit**  
42  
43  
44

45 Thank you very much for your participation in this study.

46  
47 If you wish to receive the results of this study, please indicate your email address here.  
48  
49  
50  
51  
52  
53  
54  
55  
56  
57  
58  
59  
60

**PRISMA-P (Preferred Reporting Items for Systematic review and Meta-Analysis Protocols) 2015 checklist: recommended items to address in a systematic review protocol\***

| Section and topic                 | Item No | Checklist item                                                                                                                                                                                                                | Page# in protocol |
|-----------------------------------|---------|-------------------------------------------------------------------------------------------------------------------------------------------------------------------------------------------------------------------------------|-------------------|
| <b>ADMINISTRATIVE INFORMATION</b> |         |                                                                                                                                                                                                                               |                   |
| Title:                            |         |                                                                                                                                                                                                                               | 1                 |
| Identification                    | 1a      | Identify the report as a protocol of a systematic review                                                                                                                                                                      | 2                 |
| Update                            | 1b      | If the protocol is for an update of a previous systematic review, identify as such                                                                                                                                            |                   |
| Registration                      | 2       | If registered, provide the name of the registry (such as PROSPERO) and registration number                                                                                                                                    | 2                 |
| Authors:                          |         |                                                                                                                                                                                                                               |                   |
| Contact                           | 3a      | Provide name, institutional affiliation, e-mail address of all protocol authors; provide physical mailing address of corresponding author                                                                                     | 1                 |
| Contributions                     | 3b      | Describe contributions of protocol authors and identify the guarantor of the review                                                                                                                                           | 13                |
| Amendments                        | 4       | If the protocol represents an amendment of a previously completed or published protocol, identify as such and list changes; otherwise, state plan for documenting important protocol amendments                               | 11                |
| Support:                          |         |                                                                                                                                                                                                                               |                   |
| Sources                           | 5a      | Indicate sources of financial or other support for the review                                                                                                                                                                 | 13                |
| Sponsor                           | 5b      | Provide name for the review funder and/or sponsor                                                                                                                                                                             |                   |
| Role of sponsor or funder         | 5c      | Describe roles of funder(s), sponsor(s), and/or institution(s), if any, in developing the protocol                                                                                                                            |                   |
| <b>INTRODUCTION</b>               |         |                                                                                                                                                                                                                               |                   |
| Rationale                         | 6       | Describe the rationale for the review in the context of what is already known                                                                                                                                                 | 4                 |
| Objectives                        | 7       | Provide an explicit statement of the question(s) the review will address with reference to participants, interventions, comparators, and outcomes (PICO)                                                                      | 4                 |
| <b>METHODS</b>                    |         |                                                                                                                                                                                                                               |                   |
| Eligibility criteria              | 8       | Specify the study characteristics (such as PICO, study design, setting, time frame) and report characteristics (such as years considered, language, publication status) to be used as criteria for eligibility for the review | 5                 |
| Information sources               | 9       | Describe all intended information sources (such as electronic databases, contact with study authors, trial registers or other grey literature sources) with planned dates of coverage                                         | 5                 |

|                                    |     |                                                                                                                                                                                                                                                  |        |
|------------------------------------|-----|--------------------------------------------------------------------------------------------------------------------------------------------------------------------------------------------------------------------------------------------------|--------|
| Search strategy                    | 10  | Present draft of search strategy to be used for at least one electronic database, including planned limits, such that it could be repeated                                                                                                       | 5      |
| Study records:                     |     |                                                                                                                                                                                                                                                  |        |
| Data management                    | 11a | Describe the mechanism(s) that will be used to manage records and data throughout the review                                                                                                                                                     | 6      |
| Selection process                  | 11b | State the process that will be used for selecting studies (such as two independent reviewers) through each phase of the review (that is, screening, eligibility and inclusion in meta-analysis)                                                  | 6      |
| Data collection process            | 11c | Describe planned method of extracting data from reports (such as piloting forms, done independently, in duplicate), any processes for obtaining and confirming data from investigators                                                           | 6      |
| Data items                         | 12  | List and define all variables for which data will be sought (such as PICO items, funding sources), any pre-planned data assumptions and simplifications                                                                                          | 6 & 7  |
| Outcomes and prioritization        | 13  | List and define all outcomes for which data will be sought, including prioritization of main and additional outcomes, with rationale                                                                                                             | 9      |
| Risk of bias in individual studies | 14  | Describe anticipated methods for assessing risk of bias of individual studies, including whether this will be done at the outcome or study level, or both; state how this information will be used in data synthesis                             | NA     |
| Data synthesis                     | 15a | Describe criteria under which study data will be quantitatively synthesised                                                                                                                                                                      | 9 & 10 |
|                                    | 15b | If data are appropriate for quantitative synthesis, describe planned summary measures, methods of handling data and methods of combining data from studies, including any planned exploration of consistency (such as $I^2$ , Kendall's $\tau$ ) | 10     |
|                                    | 15c | Describe any proposed additional analyses (such as sensitivity or subgroup analyses, meta-regression)                                                                                                                                            | 10     |
|                                    | 15d | If quantitative synthesis is not appropriate, describe the type of summary planned                                                                                                                                                               |        |
| Meta-bias(es)                      | 16  | Specify any planned assessment of meta-bias(es) (such as publication bias across studies, selective reporting within studies)                                                                                                                    |        |
| Confidence in cumulative evidence  | 17  | Describe how the strength of the body of evidence will be assessed (such as GRADE)                                                                                                                                                               | 12     |

**\* It is strongly recommended that this checklist be read in conjunction with the PRISMA-P Explanation and Elaboration (cite when available) for important clarification on the items. Amendments to a review protocol should be tracked and dated. The copyright for PRISMA-P (including checklist) is held by the PRISMA-P Group and is distributed under a Creative Commons Attribution Licence 4.0.**

*From: Shamseer L, Moher D, Clarke M, Ghersi D, Liberati A, Petticrew M, Shekelle P, Stewart L, PRISMA-P Group. Preferred reporting items for systematic review and meta-analysis protocols (PRISMA-P) 2015: elaboration and explanation. BMJ. 2015 Jan 2;349(jan02 1):g7647.*

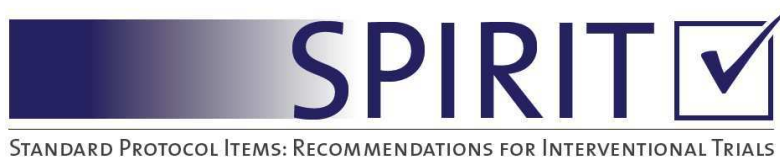

SPIRIT 2013 Checklist: Recommended items to address in a clinical trial protocol and related documents\*

| Section/item                      | Item No | Description                                                                                                                                                                                                                                                                              | Page# in protocol |
|-----------------------------------|---------|------------------------------------------------------------------------------------------------------------------------------------------------------------------------------------------------------------------------------------------------------------------------------------------|-------------------|
| <b>Administrative information</b> |         |                                                                                                                                                                                                                                                                                          |                   |
| Title                             | 1       | Descriptive title identifying the study design, population, interventions, and, if applicable, trial acronym:                                                                                                                                                                            | 1                 |
| Trial registration                | 2a      | Trial identifier and registry name. If not yet registered, name of intended registry                                                                                                                                                                                                     |                   |
|                                   | 2b      | All items from the World Health Organization Trial Registration Data Set                                                                                                                                                                                                                 |                   |
| Protocol version                  | 3       | Date and version identifier                                                                                                                                                                                                                                                              |                   |
| Funding                           | 4       | Sources and types of financial, material, and other support                                                                                                                                                                                                                              | 13                |
| Roles and responsibilities        | 5a      | Names, affiliations, and roles of protocol contributors                                                                                                                                                                                                                                  | 1 & 13            |
|                                   | 5b      | Name and contact information for the trial sponsor                                                                                                                                                                                                                                       | 1                 |
|                                   | 5c      | Role of study sponsor and funders, if any, in study design; collection, management, analysis, and interpretation of data; writing of the report; and the decision to submit the report for publication, including whether they will have ultimate authority over any of these activities |                   |
|                                   | 5d      | Composition, roles, and responsibilities of the coordinating centre, steering committee, endpoint adjudication committee, data management team, and other individuals or groups overseeing the trial, if applicable (see Item 21a for data monitoring committee)                         |                   |
| <b>Introduction</b>               |         |                                                                                                                                                                                                                                                                                          |                   |

|    |                                                           |     |                                                            |   |
|----|-----------------------------------------------------------|-----|------------------------------------------------------------|---|
| 1  |                                                           |     |                                                            |   |
| 2  | Background                                                | 6a  | Description of research question and justification for     | 1 |
| 3  | d and                                                     |     | undertaking the trial, including summary of relevant       |   |
| 4  | rationale                                                 |     | studies (published and unpublished) examining              |   |
| 5  |                                                           |     | benefits and harms for each intervention                   |   |
| 6  |                                                           |     |                                                            |   |
| 7  |                                                           | 6b  | Explanation for choice of comparators                      | 5 |
| 8  |                                                           |     |                                                            |   |
| 9  | Objectives                                                | 7   | Specific objectives or hypotheses                          | 4 |
| 10 |                                                           |     |                                                            |   |
| 11 | Trial                                                     | 8   | Description of trial design including type of trial (eg,   | 5 |
| 12 | design                                                    |     | parallel group, crossover, factorial, single group),       |   |
| 13 |                                                           |     | allocation ratio, and framework (eg, superiority,          |   |
| 14 |                                                           |     | equivalence, noninferiority, exploratory)                  |   |
| 15 |                                                           |     |                                                            |   |
| 16 |                                                           |     |                                                            |   |
| 17 | <b>Methods: Participants, interventions, and outcomes</b> |     |                                                            |   |
| 18 |                                                           |     |                                                            |   |
| 19 | Study                                                     | 9   | Description of study settings (eg, community clinic,       | 5 |
| 20 | setting                                                   |     | academic hospital) and list of countries where data will   |   |
| 21 |                                                           |     | be collected. Reference to where list of study sites can   |   |
| 22 |                                                           |     | be obtained                                                |   |
| 23 |                                                           |     |                                                            |   |
| 24 | Eligibility                                               | 10  | Inclusion and exclusion criteria for participants. If      | 8 |
| 25 | criteria                                                  |     | applicable, eligibility criteria for study centres and     |   |
| 26 |                                                           |     | individuals who will perform the interventions (eg,        |   |
| 27 |                                                           |     | surgeons, psychotherapists)                                |   |
| 28 |                                                           |     |                                                            |   |
| 29 |                                                           |     |                                                            |   |
| 30 | Interventio                                               | 11a | Interventions for each group with sufficient detail to     | 9 |
| 31 | ns                                                        |     | allow replication, including how and when they will be     |   |
| 32 |                                                           |     | administered                                               |   |
| 33 |                                                           |     |                                                            |   |
| 34 |                                                           | 11b | Criteria for discontinuing or modifying allocated          |   |
| 35 |                                                           |     | interventions for a given trial participant (eg, drug dose |   |
| 36 |                                                           |     | change in response to harms, participant request, or       |   |
| 37 |                                                           |     | improving/worsening disease)                               |   |
| 38 |                                                           |     |                                                            |   |
| 39 |                                                           |     |                                                            |   |
| 40 |                                                           | 11c | Strategies to improve adherence to intervention            |   |
| 41 |                                                           |     | protocols, and any procedures for monitoring               |   |
| 42 |                                                           |     | adherence (eg, drug tablet return, laboratory tests)       |   |
| 43 |                                                           |     |                                                            |   |
| 44 |                                                           | 11d | Relevant concomitant care and interventions that are       |   |
| 45 |                                                           |     | permitted or prohibited during the trial                   |   |
| 46 |                                                           |     |                                                            |   |
| 47 | Outcomes                                                  | 12  | Primary, secondary, and other outcomes, including the      | 9 |
| 48 |                                                           |     | specific measurement variable (eg, systolic blood          |   |
| 49 |                                                           |     | pressure), analysis metric (eg, change from baseline,      |   |
| 50 |                                                           |     | final value, time to event), method of aggregation (eg,    |   |
| 51 |                                                           |     | median, proportion), and time point for each outcome.      |   |
| 52 |                                                           |     | Explanation of the clinical relevance of chosen efficacy   |   |
| 53 |                                                           |     | and harm outcomes is strongly recommended                  |   |
| 54 |                                                           |     |                                                            |   |
| 55 |                                                           |     |                                                            |   |
| 56 |                                                           |     |                                                            |   |
| 57 |                                                           |     |                                                            |   |
| 58 |                                                           |     |                                                            |   |
| 59 |                                                           |     |                                                            |   |
| 60 |                                                           |     |                                                            |   |

|    |             |    |                                                         |    |
|----|-------------|----|---------------------------------------------------------|----|
| 1  | Participant | 13 | Time schedule of enrolment, interventions (including    | 10 |
| 2  | timeline    |    | any run-ins and washouts), assessments, and visits for  |    |
| 3  |             |    | participants. A schematic diagram is highly             |    |
| 4  |             |    | recommended (see Figure)                                |    |
| 5  |             |    |                                                         |    |
| 6  |             |    |                                                         |    |
| 7  | Sample      | 14 | Estimated number of participants needed to achieve      | 9  |
| 8  | size        |    | study objectives and how it was determined, including   |    |
| 9  |             |    | clinical and statistical assumptions supporting any     |    |
| 10 |             |    | sample size calculations                                |    |
| 11 |             |    |                                                         |    |
| 12 | Recruitme   | 15 | Strategies for achieving adequate participant enrolment | 8  |
| 13 | nt          |    | to reach target sample size                             |    |
| 14 |             |    |                                                         |    |

### Methods: Assignment of interventions (for controlled trials)

#### Allocation:

|    |           |     |                                                           |   |
|----|-----------|-----|-----------------------------------------------------------|---|
| 17 |           |     |                                                           |   |
| 18 |           |     |                                                           |   |
| 19 |           |     |                                                           |   |
| 20 | Sequen    | 16a | Method of generating the allocation sequence (eg,         | 9 |
| 21 | ce        |     | computer-generated random numbers), and list of any       |   |
| 22 | generati  |     | factors for stratification. To reduce predictability of a |   |
| 23 | on        |     | random sequence, details of any planned restriction       |   |
| 24 |           |     | (eg, blocking) should be provided in a separate           |   |
| 25 |           |     | document that is unavailable to those who enrol           |   |
| 26 |           |     | participants or assign interventions                      |   |
| 27 |           |     |                                                           |   |
| 28 |           |     |                                                           |   |
| 29 | Allocati  | 16b | Mechanism of implementing the allocation sequence         | 9 |
| 30 | on        |     | (eg, central telephone; sequentially numbered, opaque,    |   |
| 31 | conceal   |     | sealed envelopes), describing any steps to conceal the    |   |
| 32 | ment      |     | sequence until interventions are assigned                 |   |
| 33 | mechan    |     |                                                           |   |
| 34 | ism       |     |                                                           |   |
| 35 |           |     |                                                           |   |
| 36 |           |     |                                                           |   |
| 37 | Implem    | 16c | Who will generate the allocation sequence, who will       | 9 |
| 38 | entation  |     | enrol participants, and who will assign participants to   |   |
| 39 |           |     | interventions                                             |   |
| 40 |           |     |                                                           |   |
| 41 | Blinding  | 17a | Who will be blinded after assignment to interventions     | 9 |
| 42 | (masking) |     | (eg, trial participants, care providers, outcome          |   |
| 43 |           |     | assessors, data analysts), and how                        |   |
| 44 |           |     |                                                           |   |
| 45 |           | 17b | If blinded, circumstances under which unblinding is       |   |
| 46 |           |     | permissible, and procedure for revealing a participant's  |   |
| 47 |           |     | allocated intervention during the trial                   |   |
| 48 |           |     |                                                           |   |

### Methods: Data collection, management, and analysis

|    |             |     |                                                              |         |
|----|-------------|-----|--------------------------------------------------------------|---------|
| 1  |             |     |                                                              |         |
| 2  | Data        | 18a | Plans for assessment and collection of outcome,              | 5,6,7,8 |
| 3  | collection  |     | baseline, and other trial data, including any related        |         |
| 4  | methods     |     | processes to promote data quality (eg, duplicate             |         |
| 5  |             |     | measurements, training of assessors) and a description       |         |
| 6  |             |     | of study instruments (eg, questionnaires, laboratory         |         |
| 7  |             |     | tests) along with their reliability and validity, if known.  |         |
| 8  |             |     | Reference to where data collection forms can be found,       |         |
| 9  |             |     | if not in the protocol                                       |         |
| 10 |             |     |                                                              |         |
| 11 |             | 18b | Plans to promote participant retention and complete          | 8       |
| 12 |             |     | follow-up, including list of any outcome data to be          |         |
| 13 |             |     | collected for participants who discontinue or deviate        |         |
| 14 |             |     | from intervention protocols                                  |         |
| 15 |             |     |                                                              |         |
| 16 |             |     |                                                              |         |
| 17 | Data        | 19  | Plans for data entry, coding, security, and storage,         |         |
| 18 | managem     |     | including any related processes to promote data quality      |         |
| 19 | ent         |     | (eg, double data entry; range checks for data values).       |         |
| 20 |             |     | Reference to where details of data management                |         |
| 21 |             |     | procedures can be found, if not in the protocol              |         |
| 22 |             |     |                                                              |         |
| 23 |             |     |                                                              |         |
| 24 | Statistical | 20a | Statistical methods for analysing primary and                | 10      |
| 25 | methods     |     | secondary outcomes. Reference to where other details         |         |
| 26 |             |     | of the statistical analysis plan can be found, if not in the |         |
| 27 |             |     | protocol                                                     |         |
| 28 |             |     |                                                              |         |
| 29 |             | 20b | Methods for any additional analyses (eg, subgroup and        | 10      |
| 30 |             |     | adjusted analyses)                                           |         |
| 31 |             |     |                                                              |         |
| 32 |             | 20c | Definition of analysis population relating to protocol       |         |
| 33 |             |     | non-adherence (eg, as randomised analysis), and any          |         |
| 34 |             |     | statistical methods to handle missing data (eg, multiple     |         |
| 35 |             |     | imputation)                                                  |         |
| 36 |             |     |                                                              |         |
| 37 |             |     |                                                              |         |

### Methods: Monitoring

|    |            |     |                                                          |  |
|----|------------|-----|----------------------------------------------------------|--|
| 38 |            |     |                                                          |  |
| 39 |            |     |                                                          |  |
| 40 | Data       | 21a | Composition of data monitoring committee (DMC);          |  |
| 41 | monitoring |     | summary of its role and reporting structure; statement   |  |
| 42 |            |     | of whether it is independent from the sponsor and        |  |
| 43 |            |     | competing interests; and reference to where further      |  |
| 44 |            |     | details about its charter can be found, if not in the    |  |
| 45 |            |     | protocol. Alternatively, an explanation of why a DMC is  |  |
| 46 |            |     | not needed                                               |  |
| 47 |            |     |                                                          |  |
| 48 |            | 21b | Description of any interim analyses and stopping         |  |
| 49 |            |     | guidelines, including who will have access to these      |  |
| 50 |            |     | interim results and make the final decision to terminate |  |
| 51 |            |     | the trial                                                |  |
| 52 |            |     |                                                          |  |
| 53 |            |     |                                                          |  |
| 54 |            |     |                                                          |  |
| 55 |            |     |                                                          |  |
| 56 |            |     |                                                          |  |
| 57 |            |     |                                                          |  |
| 58 |            |     |                                                          |  |
| 59 |            |     |                                                          |  |
| 60 |            |     |                                                          |  |

|          |    |                                                                                                                                                                                   |  |
|----------|----|-----------------------------------------------------------------------------------------------------------------------------------------------------------------------------------|--|
| Harms    | 22 | Plans for collecting, assessing, reporting, and managing solicited and spontaneously reported adverse events and other unintended effects of trial interventions or trial conduct |  |
| Auditing | 23 | Frequency and procedures for auditing trial conduct, if any, and whether the process will be independent from investigators and the sponsor                                       |  |

### Ethics and dissemination

|                               |     |                                                                                                                                                                                                                                  |                  |
|-------------------------------|-----|----------------------------------------------------------------------------------------------------------------------------------------------------------------------------------------------------------------------------------|------------------|
| Research ethics approval      | 24  | Plans for seeking research ethics committee/institutional review board (REC/IRB) approval                                                                                                                                        | 5                |
| Protocol amendments           | 25  | Plans for communicating important protocol modifications (eg, changes to eligibility criteria, outcomes, analyses) to relevant parties (eg, investigators, REC/IRBs, trial participants, trial registries, journals, regulators) | 11               |
| Consent or assent             | 26a | Who will obtain informed consent or assent from potential trial participants or authorised surrogates, and how (see Item 32)                                                                                                     | 8                |
|                               | 26b | Additional consent provisions for collection and use of participant data and biological specimens in ancillary studies, if applicable                                                                                            | 20<br>Appendix 2 |
| Confidentiality               | 27  | How personal information about potential and enrolled participants will be collected, shared, and maintained in order to protect confidentiality before, during, and after the trial                                             | 21<br>Appendix 2 |
| Declaration of interests      | 28  | Financial and other competing interests for principal investigators for the overall trial and each study site                                                                                                                    | 13               |
| Access to data                | 29  | Statement of who will have access to the final trial dataset, and disclosure of contractual agreements that limit such access for investigators                                                                                  | 13               |
| Ancillary and post-trial care | 30  | Provisions, if any, for ancillary and post-trial care, and for compensation to those who suffer harm from trial participation                                                                                                    |                  |



|    |                 |     |                                                           |
|----|-----------------|-----|-----------------------------------------------------------|
| 1  |                 |     |                                                           |
| 2  | Dissemina       | 31a | Plans for investigators and sponsor to communicate        |
| 3  | tion policy     |     | trial results to participants, healthcare professionals,  |
| 4  |                 |     | the public, and other relevant groups (eg, via            |
| 5  |                 |     | publication, reporting in results databases, or other     |
| 6  |                 |     | data sharing arrangements), including any publication     |
| 7  |                 |     | restrictions                                              |
| 8  |                 |     |                                                           |
| 9  |                 | 31b | Authorship eligibility guidelines and any intended use of |
| 10 |                 |     | professional writers                                      |
| 11 |                 |     |                                                           |
| 12 |                 | 31c | Plans, if any, for granting public access to the full     |
| 13 |                 |     | protocol, participant-level dataset, and statistical code |
| 14 |                 |     |                                                           |
| 15 |                 |     |                                                           |
| 16 | <b>Appendic</b> |     |                                                           |
| 17 | <b>es</b>       |     |                                                           |
| 18 |                 |     |                                                           |
| 19 | Informed        | 32  | Model consent form and other related documentation        |
| 20 | consent         |     | given to participants and authorised surrogates           |
| 21 | materials       |     |                                                           |
| 22 |                 |     |                                                           |
| 23 | Biological      | 33  | Plans for collection, laboratory evaluation, and storage  |
| 24 | specimens       |     | of biological specimens for genetic or molecular          |
| 25 |                 |     | analysis in the current trial and for future use in       |
| 26 |                 |     | ancillary studies, if applicable                          |
| 27 |                 |     |                                                           |

\*It is strongly recommended that this checklist be read in conjunction with the SPIRIT 2013 Explanation & Elaboration for important clarification on the items. Amendments to the protocol should be tracked and dated. The SPIRIT checklist is copyrighted by the SPIRIT Group under the Creative Commons "[Attribution-NonCommercial-NoDerivs 3.0 Unported](https://creativecommons.org/licenses/by-nc-nd/3.0/)" license.

# BMJ Open

## Interpretation of health news items reported with or without spin: Protocol for a prospective meta-analysis of 16 randomized controlled trials

|                                 |                                                                                                                                                                                                                                                                                                                                                                                                                                                                                                                                                                                                                                                                                                                                                                                                                                                                                                                                                                                                                                                   |
|---------------------------------|---------------------------------------------------------------------------------------------------------------------------------------------------------------------------------------------------------------------------------------------------------------------------------------------------------------------------------------------------------------------------------------------------------------------------------------------------------------------------------------------------------------------------------------------------------------------------------------------------------------------------------------------------------------------------------------------------------------------------------------------------------------------------------------------------------------------------------------------------------------------------------------------------------------------------------------------------------------------------------------------------------------------------------------------------|
| Journal:                        | <i>BMJ Open</i>                                                                                                                                                                                                                                                                                                                                                                                                                                                                                                                                                                                                                                                                                                                                                                                                                                                                                                                                                                                                                                   |
| Manuscript ID                   | bmjopen-2017-017425.R1                                                                                                                                                                                                                                                                                                                                                                                                                                                                                                                                                                                                                                                                                                                                                                                                                                                                                                                                                                                                                            |
| Article Type:                   | Protocol                                                                                                                                                                                                                                                                                                                                                                                                                                                                                                                                                                                                                                                                                                                                                                                                                                                                                                                                                                                                                                          |
| Date Submitted by the Author:   | 09-Sep-2017                                                                                                                                                                                                                                                                                                                                                                                                                                                                                                                                                                                                                                                                                                                                                                                                                                                                                                                                                                                                                                       |
| Complete List of Authors:       | HANEEF, Romana; INSERM UMR 1153, Center of Research in Epidemiology and Statistics Sorbonne Paris Cité, Center of Epidemiology and Clinical Research; Universite Paris Descartes Faculte de Medecine<br>Yavchitz, Amelie; INSERM, UMR 1153, Epidemiology and Biostatistics Sorbonne Paris Cité Center (CRESS), METHODS team; French Cochrane Center<br>Ravaud, Philippe; INSERM, UMR 1153, Epidemiology and Biostatistics Sorbonne Paris Cité Center (CRESS), METHODS team; Centre d'Épidémiologie Clinique, AP-HP (Assistance Publique des Hôpitaux de Paris), Hôpital Hôtel Dieu<br>Baron, Gabriel; Centre d'Épidémiologie Clinique, AP-HP (Assistance Publique des Hôpitaux de Paris), Hôpital Hôtel Dieu<br>Oranksy, Ivan; New York University's Arthur Carter Journalism Institute<br>Schwitzer, Gary; University of Minnesota, School of Public Health<br>Boutron, Isabelle; Université Paris Descartes, Centre d'Épidémiologie clinique; INSERM, UMR 1153, Epidemiology and Biostatistics Sorbonne Paris Cité Center (CRESS), METHODS team |
| <b>Primary Subject Heading</b>: | Research methods                                                                                                                                                                                                                                                                                                                                                                                                                                                                                                                                                                                                                                                                                                                                                                                                                                                                                                                                                                                                                                  |
| Secondary Subject Heading:      | Public health, Communication                                                                                                                                                                                                                                                                                                                                                                                                                                                                                                                                                                                                                                                                                                                                                                                                                                                                                                                                                                                                                      |
| Keywords:                       | Spin, Meta-analysis, Randomized controlled trials, Health News, Patients, General public                                                                                                                                                                                                                                                                                                                                                                                                                                                                                                                                                                                                                                                                                                                                                                                                                                                                                                                                                          |
|                                 |                                                                                                                                                                                                                                                                                                                                                                                                                                                                                                                                                                                                                                                                                                                                                                                                                                                                                                                                                                                                                                                   |

SCHOLARONE™  
Manuscripts

1  
2  
3  
4  
5  
6  
7  
8  
9  
10  
11  
12  
13  
14  
15  
16  
17  
18  
19  
20  
21  
22  
23  
24  
25  
26  
27  
28  
29  
30  
31  
32  
33  
34  
35  
36  
37  
38  
39  
40  
41  
42  
43  
44  
45  
46  
47  
48  
49  
50  
51  
52  
53  
54  
55  
56  
57  
58  
59  
60

## Interpretation of health news items reported with or without spin: Protocol for a prospective meta-analysis of 16 randomized controlled trials

Romana HANEEF (1,2,3), Amélie YAVCHITZ (1,3,4), Philippe RAVAUD (1,2,3,4,5), Gabriel BARON (3), Ivan ORANSKY (6), Gary SCHWITZER (7), Isabelle BOUTRON\* (1,2,3,4)

- (1) INSERM, UMR 1153, Epidemiology and Biostatistics Sorbonne Paris Cité Center (CRESS), METHODS team, Paris, France
- (2) Paris Descartes University, Sorbonne Paris Cité, Faculté de Médecine, Paris, France
- (3) Centre d'Épidémiologie Clinique, AP-HP (Assistance Publique des Hôpitaux de Paris), Hôpital Hôtel Dieu, Paris, France
- (4) French Cochrane Center, Paris, France
- (5) Department of Epidemiology, Columbia University Mailman School of Public Health, New York, NY, USA
- (6) New York University's Arthur Carter Journalism Institute, New York, USA
- (7) University of Minnesota, School of Public Health, Minnesota, USA

\*Corresponding author:

Isabelle BOUTRON

Centre d'Epidémiologie Clinique

Hôpital Hôtel Dieu,

1, Place du parvis Notre Dame

75004 Paris Cedex 4

E-mail : [isabelle.boutron@aphp.fr](mailto:isabelle.boutron@aphp.fr)

Tel : 00 33 1 42 34 78 33

Fax : 00 33 1 42 34 87 90

## ABSTRACT

**Introduction:** We aim to compare the interpretation of health news items reported with or without spin. “Spin” is defined as a misrepresentation of study results, regardless of motive (intentionally or unintentionally) that overemphasizes the beneficial effects of the intervention and overstates safety compared to that shown by the results.

**Methods and analysis:** We have planned a series of 16 RCTs to perform a prospective meta-analysis. We will select a sample of health news items reporting the results of 4 types of study designs, evaluating the effect of pharmacologic treatment and containing the highest amount of spin in the headline and text. News items reporting 4 types of studies will be included: 1) pre-clinical studies, 2) phase I/II (non-randomized) trials, 3) randomized controlled trials (RCTs), 4) observational studies. We will rewrite the selected news items and remove the spin. The original news and rewritten news will be appraised by 4 types of populations: 1) French-speaking patients, 2) French-speaking general public, 3) English-speaking patients, and 4) English-speaking general public. Each RCT will explore the interpretation of news items reporting one of the 4 study designs by each type of population and will include a sample size of 300 participants. The primary outcome will be participants’ interpretation of the benefit of treatment after reading the news items: (*What do you think is the probability that treatment X would be beneficial to patients? (scale, 0 [very unlikely] to 10 [very likely])*).

This study will evaluate the impact of spin on the interpretation of health news reporting results of studies by patients and the general public.

**Ethics and dissemination:** This study has obtained ethics approval from the Institutional Review Board of INSERM, (registration No IRB00003888). The description of all the steps and the results of this prospective meta-analysis will be available online.

**Registration number:** CRD42017058941

### Strengths and limitations of this study

- This will be the first prospective meta-analysis of randomized controlled trials for interpretation of health news items reporting the results of studies with or without spin.
- It will address the impact of spin on the interpretation of health news by patients and the general public.
- The involvement of patients and the public may help to improve the reporting of medical research in health news.
- News stories are only one way that the public hears news about health.
- Logistically, the recruitment of large number of participants at the same time may be a challenge, but to manage this, participants will be recruited separately for each trial.

## INTRODUCTION

Health news is an important way to communicate updates about medical research to the public. News items reporting the results of medical research attract a large audience [1]. However, the quality of reporting in health news is uneven. The merits of a wide range of treatments and tests are overplayed, and harms are underplayed [2]. Several studies have shown the presence of spin (i.e., distorted presentation of study results) in health news [3-10]. Distorted facts can be misleading and can affect the behaviour of physicians, healthcare providers and patients [11-12]. However, little research has assessed whether spin can affect readers' interpretation [13]. Some studies have explored whether laypeople are able to recognize the tentativeness of research findings reported in media [14-15]. Kimmerle et al. found that negative framing and accentuation of the limited reliability of provisional research findings in a newspaper report made people more aware of the tentativeness of these findings [14]. In another work, the authors assessed the impact of some personality factors (i.e., scientific literacy, epistemology beliefs, and academic self-efficacy) and previous users' comments on an online website on laypeople's understanding of the tentativeness of medical research findings. Laypeople's understanding of the tentativeness of research findings was influenced by their personality factors and also by other users' comments contributed to the forum [15].

To our knowledge, no meta-analysis has assessed whether news items reported with spin can influence readers' interpretations.

Our hypothesis is that spin can influence the reader's interpretation of health news items. We aim to compare the interpretation of health news items reported with or without spin. We will focus on news items reporting studies evaluating the effect of a pharmacological treatment, containing the largest amount of spin in the headline and text, and receiving high levels of public attention online.

## METHODS

### Theoretical framework

Previous works have shown a high prevalence of spin in scientific articles [16-19] and in the mass media [8-10 20]. However, a question remains: Are readers influenced by spin or are they able to disentangle the appropriate interpretation from the news? In this study, we will consider only news items reporting studies evaluating pharmacological treatments where readers may overestimate the beneficial effect of the treatment if the news is reported with spin and change their behavior accordingly. We will consider different types of readers: patients and the main public. To increase generalisability we will also consider two different populations: located in the United States and in France.

### Definition of “spin”

In the context of this study, we define “spin” as a misrepresentation of study results, regardless of motive (intentionally or unintentionally) that overemphasizes the beneficial effects of the intervention and overstates safety compared to that shown by the results [16].

The definition of spin we used has been used for exploring spin in the scientific literature [8 13 16 19 21 22]. This definition does not take into account the notion of intent because it is impossible to distinguish between the two (i.e., intentional and unintentional spin) and the consequences for readers could be the same.

### Study design

We have planned a series of 16 randomized controlled trials (RCTs) to perform a prospective meta-analysis (MA), and a comparing the interpretation of health news items reported with or without spin. Each RCT will explore the interpretation of news items reporting one of 4 study designs: 1) pre-clinical studies, 2) phase I/II trials (non-randomized), 3) RCTs, and 4) observational studies. The news items reporting each study design will be assessed by 4 different

1  
2  
3 targeted populations: 1) French-speaking patients, 2) French-speaking general public, 3) English-  
4 speaking patients, and 4) English-speaking general public. Each RCT will be a parallel group  
5 with two-arms. In each RCT, participants will be randomly assigned to appraise health news  
6 items reported with or without spin (*see figure 1*).  
7  
8  
9

10  
11  
12 The planning, implementation, analysis and writing of this protocol will follow the SPIRIT [23]  
13 and PRISMA-P [24] guidelines. This study has obtained ethics approval from the Institutional  
14 Review Board of INSERM, (registration No IRB00003888), and the protocol is registered at  
15 PROSPERO website (CRD42017058941).  
16  
17  
18  
19

## 20 21 22 **News items with and without spin**

### 23 24 25 *Selection of news items with spin*

26  
27 News items reporting studies evaluating a pharmacologic treatment that received a great deal of  
28 public attention online and contained a large amount of spin in the headline and text will be  
29 selected from a sample of news items retrieved from Altmetric Explorer.  
30  
31  
32  
33

### 34 35 *Search strategy*

36  
37 We will search for articles on “PubMed” using the following search strategy: field ((Randomized  
38 controlled trial[Publication Type] OR Observational study[Publication Type]) OR Meta-  
39 analysis[Publication Type]) OR Randomized[Title/Abstract] OR controlled[Title/Abstract] OR  
40 trial[Title/Abstract] OR cross-sectional[Title/Abstract] OR case-control[Title/Abstract] OR  
41 cohort[Title/Abstract] OR Meta-analysis[Title/Abstract] OR systematic review[Title/Abstract])  
42 AND (has abstract [text] AND ("2014/01/01"[PDAT] : "2014/06/30"[PDAT])). The publication  
43 period will be restricted to the first 6 months of 2014 to minimize the risk of recall bias among  
44 study participants.  
45  
46  
47  
48  
49  
50  
51  
52

53  
54  
55 To retrieve relevant news coverage of these articles, we will apply the “PubMed search details”  
56 on “Altmetric Explorer”. The Web application Altmetric Explorer provides access to all sources  
57  
58  
59  
60



1  
2  
3 where the published study is mentioned online in the mass media and sorts the items according  
4  
5 to the Altmetric score [25]. The Altmetric score is one way to quantify the public attention an  
6  
7 article received in online news outlets, blogs and social media (<https://www.altmetric.com/>) (a  
8  
9 high Altmetric score = high public attention).  
10

### 11 12 *Screening process*

13  
14 Screening will be performed in two steps: first, one researcher will systematically screen the  
15  
16 retrieved Altmetric Explorer citations, which will be sorted from the highest to the lowest  
17  
18 Altmetric score (i.e., highest to lowest amount of public attention), and will identify studies  
19  
20 evaluating the effect of a pharmacological treatment, regardless of study design and study  
21  
22 population (including human and animal/laboratory). For each study fulfilling eligibility criteria,  
23  
24 the researcher will retrieve 1) the published article and 2) all related online news items available  
25  
26 at Altmetric Explorer.  
27  
28

29  
30 Second, the researcher will identify the news item with spin in the headline and text by using a  
31  
32 standard scheme of spin [10 19]. When several news items have spin in the headline, the  
33  
34 researcher will select the news item with the most spin in the text. We will include news items  
35  
36 reported by general or medical news outlets or lay press whose target consumers are the general  
37  
38 population.  
39

40  
41 As a quality procedure, a second researcher will confirm the eligibility of all included studies  
42  
43 and screen 10% of the excluded studies.  
44

45  
46 The screening process will be performed sequentially, the studies being sorted from the highest  
47  
48 to the lowest Altmetric score (i.e., highest to lowest public attention). We will include the first 40  
49  
50 studies fulfilling the eligibility criteria and relevant 40 news items containing the most spin in the  
51  
52 headline and text: 10 reporting pre-clinical studies, 10 reporting phase I/II non-randomized trials,  
53  
54 10 news items reporting RCTs and 10 reporting observational studies.  
55  
56  
57  
58  
59  
60

### ***Identification and description of spin***

We will identify the spin in the headlines and text of selected news items and will classify them according to following 3 categories of spin — misleading reporting, misleading interpretation and misleading extrapolation — that were previously developed [10].

***Misleading reporting*** is defined as incomplete or inadequate reporting of any important information in the context of the research that could be misleading for the reader. This category includes 1) misleading reporting of study design; 2) not reporting study population (if an animal study); 3) selective reporting of outcomes favoring the beneficial effect of the treatment (e.g., statistically significant results for efficacy outcomes or statistically non-significant results for safety outcomes); 4) not reporting adverse events; 5) linguistic spin (i.e., any word or expression emphasizing the beneficial effect of the treatment [26]; 6) not reporting study limitations; 7) not reporting any caution about study design and results, and 8) any other type of misleading reporting not classified under the above section.

***Misleading interpretation*** is defined as an interpretation of the study results in news stories that is not consistent with the results reported in the scientific articles and overestimating the beneficial effect of the treatment. This category includes claiming 1) a beneficial effect of the treatment despite statistically non-significant results; 2) an equivalent effect of the treatment for statistically non-significant results in superiority RCTs; 3) that the treatment is safe for statistically non-significant results despite a lack of power; 4) safety of the treatment despite adverse events reported in the scientific articles; 5) a causal effect (i.e., implies a cause-and-effect relationship between the intervention being assessed and the outcome of interest [27]) despite a non-randomized study design; 6) a beneficial effect of the treatment despite a small sample size; and 7) a beneficial effect despite lack of a comparator as well as 8) focus on p-value instead of clinical importance; 9) interpretation of relative risk as absolute risk; and 10) any other type of misleading interpretation not otherwise classified.

1  
2  
3 *Misleading extrapolation* is defined as overgeneralization of study results in news stories  
4  
5 to different populations, interventions or outcomes that were not assessed in the study. This  
6  
7 category includes extrapolating 1) animal study results to human application; 2) preliminary  
8  
9 study results to clinical application; 3) the effect of study outcomes to other outcomes for the  
10  
11 disease; 4) the beneficial effect of the study intervention to a different intervention (e.g.,  
12  
13 broccoli, which contains sulphoraphane, was claimed as beneficial by health news items, but the  
14  
15 study evaluated the benefit of a sulphoraphane compound only); and 5) from the study  
16  
17 participants to a larger or different population as well as 6) inappropriate implications for clinical  
18  
19 or daily use (i.e., an improper recommendation or advice to use the intervention in clinical  
20  
21 practice or daily use not supported by study results); and 7) any other types of extrapolation not  
22  
23 otherwise classified.  
24  
25  
26

27  
28 All other spin that could not be classified with this scheme will be systematically recorded and  
29  
30 secondarily classified.  
31  
32  
33  
34  
35  
36

### 37 **Construction of news without spin**

#### 38 *Format of the news items*

39  
40 Our aim is to keep the same context and format of the original news item and conceal the names  
41  
42 of pharmacological treatments, authors and funders to avoid evaluation bias. Consequently, to  
43  
44 rewrite the news items we will:  
45  
46  
47

- 48 1. Keep the same context and structure
- 49 2. Create hypothetical names of reported pharmacological treatments
- 50 3. Conceal the names of study authors and experts by using different names selected based on  
51  
52 the origin of the name from an online list of names including all countries of the world  
53  
54  
55  
56  
57  
58  
59  
60

(<http://www.studentsoftheworld.info/penpals/stats.php3?Pays>) to keep the news content natural.

4. Keep the name of the research institute/university/hospital where the study was conducted.
5. Replace the name of the funding source with standardized terms for profit or non-profit funding organizations.
6. Delete the name of the online news outlet, date the news story was published online, name of the journalist who wrote the news with spin, name of the medical journal in which the study was published, reference to the original article and trial registration number or name (if reported).

#### ***Guidelines to remove spin in the news items***

To construct health news stories without spin, we will delete the spin identified in the headline and text and will add some caution, depending on context. The guidelines used to remove the spin are described in Table 1. The guidelines to add caution are in Table 2.

One researcher (RH) will identify and remove the spin in each news item selected (in the headline and text) and will rewrite the news story without spin, according to the guidelines described in Tables 1 and 2. Two researchers (IB) and (AY) will check the rewritten news items. Finally, a sample of the rewritten news stories will be checked by a researcher working in the field of medical journalism (IO). Appendix 1 provides an example of a news item reported with and without spin. Our sample of news will contain 80 news items [40 original news items (with spin) and 40 rewritten news items (without spin)].

## Translation of the news items reported with and without spin

All news items will be translated into French language to be used in RCTs involving French-speaking participants. One French native speaker researcher (AY) will validate the French translation of news items. Further, a French medical journalist will also validate the French translated news items.

## Population

We will compare the health news reported in English and French languages and will assess their interpretation by different types of populations to increase the generalisability of our results.

Each RCT will target one of the four following study populations:

1. French-speaking patients
2. French-speaking general public
3. English-speaking patients
4. English-speaking general public

## Eligibility criteria

We will enroll participants older than 30 years.

## Recruitment strategy

To recruit participants, we will contact online communities of patients, patients' associations, popular health forums, and investigators of e-cohorts. We will also use the online platform ([www.findparticipants.com](http://www.findparticipants.com)) which enables access to thousands of interested participants to

1  
2  
3 participate in research studies worldwide. We will also advertise the study in hospitals and GP  
4  
5 practices.  
6

7 Each participant will provide an online informed consent at the time of enrollment.  
8

9 We will send participants an invitation by email (appendix 2). If respondents agree to participate  
10  
11 in the survey, an Internet link included in the invitation email will give them access to  
12  
13 information regarding the study and a screening question asking them whether they are willing to  
14  
15 participate in the study. If they answer yes, respondents will be randomly assigned to read 1  
16  
17 news item with spin or one news item without spin.  
18  
19

20 Invitation emails will be sent in waves until the planned number of participants log on and  
21  
22 complete the assessment. A maximum of two reminders will be sent to participants.  
23  
24  
25  
26  
27

## 28 **Interventions**

29  
30 We will compare the interpretation of “health news items” reported with spin (original news =  
31  
32 active comparator) or without spin (rewritten news = experimental group).  
33  
34  
35  
36

## 37 **Random assignment**

38  
39 A random assignment sequence will be computer-generated by a statistician by using blocks of  
40  
41 10 (i.e., number of news items selected x 2) for each study design type. The list will not be  
42  
43 disclosed to investigators. Allocation concealment will be assured by the use of a computerized  
44  
45 random-assignment system. After randomization, participants will be asked to complete a  
46  
47 questionnaire. Participants who log on and do not evaluate the news will be excluded and the  
48  
49 news item will be automatically allocated to another participant.  
50  
51  
52  
53  
54

## 55 **Blinding**

1  
2  
3 Blinding of participants is not possible, but to minimize bias, participants will be blinded to the  
4  
5 study hypothesis. All participants will be informed that they are participating in a survey about  
6  
7 the interpretation of news reporting medical research that evaluates treatments. They will not be  
8  
9 informed about the objectives and hypothesis of the study.  
10

11 After the completion of study, each participant will be told about the study objectives, hypothesis  
12  
13 and results.  
14

### 15 16 17 18 **Study outcomes** 19

20 Our primary outcome will be participants' interpretation of the benefit of the treatment measured  
21  
22 on a scale from 0 to 10.  
23

- 24  
25 1. *What do you think is the probability that treatment X would be beneficial to patients?*  
26  
27 *(scale, 0 [very unlikely] to 10 [very likely])*  
28

29  
30  
31 Secondary outcomes are as follows:  
32

- 33  
34 2. *What do you think is the size of the potential benefit for patients? (scale, [none, small,*  
35  
36 *moderate or large])*  
37  
38 3. *How safe do you think that treatment X would be for patients? (scale, 0 [very unsafe] to 10*  
39  
40 *[very safe])*  
41  
42 4. *Do you think this treatment should be offered to patients in the short term? (scale, 0 [*  
43  
44 *absolutely no] to 10 [absolutely yes])*  
45  
46  
47 5. *Do you think this treatment will make a difference in the existing clinical practice? (scale, 0*  
48  
49 *[absolutely no] to 10 [absolutely yes])*  
50  
51

52  
53  
54 These study outcomes are surrogate markers measuring the perception by readers of the  
55  
56 treatments' efficacy, safety, availability and use in current clinical practice.  
57  
58  
59  
60

## Sample size

Each participant will read a news item with or without spin. We want to assess a mean difference of 1.0 for the primary outcome between groups on a 0-10 scale, with a standard deviation of 2.5 [13]. For each RCT, a sample of 266 assessments of news items will be needed to detect an effect size of 0.4 with a power of 90% and  $\alpha$  risk of 5% for each RCT. Each news item will be read the same number of times (balanced design) and we will take into account clustering due to the fact that a news items will be read many times. To achieve this, we will use a sample size of 300 participants (150 in each group) in each RCT (i.e., an inflation factor of about 1.1). Therefore, each news item will be assessed 15 times in each group (10 news items with or without spin for 150 participants) for each RCT.

## Statistical analysis

The statistical analysis will be undertaken by a statistician who will use R v2.15.1 (R foundation for Statistical Computing, Vienna, Austria) at the Center for Clinical Epidemiology, Paris, France. All outcomes will be quantitative and the number of participants and news items will be balanced in each group. For each RCT, the following analysis will be done: The differences between groups will be analyzed by using a linear mixed model with a fixed group effect and random group effect and news items–group interaction effects. Random effects will allow us to account for the following 2 levels of clustering: within-group clustering as a result of the news (each news item will be assessed 15 times in each group) and between-group clustering (pairing between the news used in the 2 arms of the trial). Inferences will be based on the restricted maximum likelihood. This model will compare the mean difference between 2 arms for each trial. For primary and secondary outcomes, we will estimate the difference between means with 95% confidence intervals (CIs).  $P < 0.05$  will be considered statistically significant.



1  
2  
3 Finally, after analyzing each RCT separately, a prospective meta-analysis will be done to  
4  
5 summarize intervention effects. The mean difference with 95% CIs will be estimated by using a  
6  
7 random-effects model based on the DerSimonian-Laird method. Forest plots will be created for  
8  
9 visual interpretation of results. The heterogeneity will be assessed by  $X^2$  test ( $P < 0.05$ ) and  
10  
11 degree of heterogeneity by the  $I^2$  statistic ( $> 75\%$ ) to assess statistical significance (Higgins JPT  
12  
13 et al, 2014). We will also assess the variance ( $\tau^2$ ) between trials.  
14  
15  
16  
17  
18  
19  
20

## 21 **STUDY DURATION**

22  
23 The total duration of this study will be 24 months. Expected period of inclusion of participants  
24  
25 will also be 24 months and the duration of participation per participant/patient will be 1 hour.  
26  
27

28 The anticipated start date of trials will be June, 2017.  
29  
30  
31  
32  
33  
34  
35  
36  
37  
38  
39  
40  
41  
42  
43  
44  
45  
46  
47  
48  
49  
50  
51  
52  
53  
54  
55  
56  
57  
58  
59  
60

## DISCUSSION

To best of our knowledge, we present the first prospective meta-analysis of randomized controlled trials for interpretation of health news items reporting the results of studies with or without spin.

We have designed 16 randomized controlled trials which will focus on interpretation of news items reporting results of 4 types of study designs: 1) pre-clinical studies, 2) phase I/II trials (non-randomized), 3) RCTs, and 4) observational studies. There will be 80 news items reporting these study designs (20 new items / study design: 10 original news items with spin + 10 rewritten news items without spin). Each RCT will target one of the 4 types of populations: 1) French-speaking patients, 2) French-speaking general public, 3) English-speaking patients, and 4) English-speaking general public. In total, 4800 participants will be involved in 16 planned RCTs (300 participants/ RCT). Once the planned RCTs are completed, then the results of different RCTs will be included to perform a meta-analysis.

The concept of prospective meta-analysis allows us to compare the interpretation of health news stories reporting results of studies with or without spin by different types of populations. This new form of synthesis of evidence answers the question of whether spin can influence patients' and the publics' interpretation of health news.

We will document all practical issues and difficulties encountered to demonstrate that this type of synthesis of evidence is feasible. We are aware of some challenges, such as recruitment of participants. Logistically, the recruitment of large number of participants at the same time may be a challenge, but to manage this, participants will be recruited separately for each trial.

## EXPECTED RESULTS

1  
2  
3 This study will evaluate the impact of spin on patients' and the public's interpretation of news  
4  
5 items reporting results of studies.  
6  
7  
8  
9  
10

## 11 **Supplementary Data**

12  
13  
14 Appendix 1: An example of a news item with and without spin

15  
16  
17 Appendix 2: Informed consent  
18  
19  
20  
21  
22  
23  
24  
25  
26  
27  
28  
29  
30  
31  
32  
33  
34  
35  
36  
37  
38  
39  
40  
41  
42  
43  
44  
45  
46  
47  
48  
49  
50  
51  
52  
53  
54  
55  
56  
57  
58  
59  
60

1  
2  
3  
4  
5  
6  
7  
8  
9  
10  
11  
12  
13  
14  
15  
16  
17  
18  
19  
20  
21  
22  
23  
24  
25  
26  
27  
28  
29  
30  
31  
32  
33  
34  
35  
36  
37  
38  
39  
40  
41  
42  
43  
44  
45  
46  
47  
48  
49  
50  
51  
52  
53  
54  
55  
56  
57  
58  
59  
60

## MODIFICATIONS MADE IN THE PROTOCOL SUBMITTED TO ETHICAL COMMITTEE

We made following changes in the protocol submitted to the ethical committee:

### Rewriting news items

- Word count: The condition to keep the word count of  $\pm 20\%$  from original news to rewritten news items is deleted.
- Concealment: The name of the research institute/university/hospital where the study was conducted will be kept in the rewritten news items.
- Guidelines to remove spin: We will also report the caution or recommendation by study authors, reported in the related article when available.

### Survey questionnaire

- We merged two questions related to demographic information into one: How often do you read news items? Never/sometimes (once per month)/often(once per week)/daily

### Guidelines

- We report SPIRIT and PRISMA-P guidelines to follow for protocols of clinical trials and meta-analysis respectively.

### **Acknowledgements**

The authors thank Laura Smales (BioMedEditing, Toronto, Canada) for language revision of this protocol, and the members of New York University's Science, Health and Environmental Reporting Program for their assistance rewriting some of the news items used in this work.

### **Contributors**

RH: Helped with conception of study design, selecting news items, rewriting news items and wrote the draft of the protocol, AY: Helping with validation of rewritten the news items and French translation of selected news items, PR: Conception of study design, GB: Helped to write the statistical analysis, IO: Helped with survey questionnaire and validation of rewritten news items, GS: Helped with survey questionnaire, IB: Conception of study design, validating rewritten news items, and helped to write the draft of the protocol.

All authors read and approved the final protocol.

### **Funding**

None

### **Competing interests**

None declared

### **Data sharing statement**

This article is the protocol of a prospective meta-analysis. The authors plan to report transparently all the planned trials and will provide open access to all extracted data for each trial.

### **Open Access**

This is an Open Access article distributed in accordance with the Creative Commons Attribution Non Commercial (CC BY-NC 4.0) license, which permits others to distribute, remix, adopt, build upon this work non-commercially, and license their derivative works on different terms, provided the original work is properly cited and the use is non-commercial. See: <http://creativecommons.org/licenses/by-nc/4.0/>

### **Ethics and dissemination**

“This study obtained ethics approval from the Institutional Review board of INSERM (Registration No: IRB0003888), and the protocol is registered at the PROSPERO website (CRD42017058941). We report SPIRIT [23] and PRISMA-P [24] guidelines for protocols of clinical trials and meta-analyses, respectively. The results of this meta-analysis will be disseminated as a published article. Upon the completion of this study, the results will be sent to all participants.”

## REFERENCES

1. Sharma V, Dowd M, Swanson DS, Slaughter AJ, Simon SD. Influence of the news media on diagnostic testing in the emergency department. *Archives of Pediatrics & Adolescent Medicine* 2003;**157**(3):257-60 doi: 10.1001/archpedi.157.3.257[published Online First: Epub Date].
2. Richards T, Montori VM, Godlee F, Lapsley P, Paul D. Let the patient revolution begin. *BMJ* 2013;**346** doi: 10.1136/bmj.f2614[published Online First: Epub Date].
3. Moynihan R, Bero L, Ross-Degnan D, et al. Coverage by the News Media of the Benefits and Risks of Medications. *New England Journal of Medicine* 2000;**342**(22):1645-50 doi: doi:10.1056/NEJM200006013422206[published Online First: Epub Date].
4. Woloshin S, Schwartz LM. Press releases: Translating research into news. *JAMA* 2002;**287**(21):2856-58 doi: 10.1001/jama.287.21.2856[published Online First: Epub Date].
5. Schwitzer G. How Do US Journalists Cover Treatments, Tests, Products, and Procedures? An Evaluation of 500 Stories. *PLoS Med* 2008;**5**(5):e95 doi: 10.1371/journal.pmed.0050095[published Online First: Epub Date].
6. Lancet. Incomplete reporting of research in academic press releases. *The Lancet*;373(9679):1920 doi: [http://dx.doi.org/10.1016/S0140-6736\(09\)61044-8](http://dx.doi.org/10.1016/S0140-6736(09)61044-8)[published Online First: Epub Date].
7. Schwartz LM, Woloshin S, Andrews A, Stukel TA. Influence of medical journal press releases on the quality of associated newspaper coverage: retrospective cohort study. *BMJ* 2012;**344** doi: 10.1136/bmj.d8164[published Online First: Epub Date].
8. Yavchitz A, Boutron I, Bafeta A, et al. Misrepresentation of Randomized Controlled Trials in Press Releases and News Coverage: A Cohort Study. *PLoS Med* 2012;**9**(9):e1001308 doi: 10.1371/journal.pmed.1001308[published Online First: Epub Date].
9. Sumner P, Vivian-Griffiths S, Boivin J, et al. The association between exaggeration in health related science news and academic press releases: retrospective observational study. *BMJ* 2014;**349** doi: 10.1136/bmj.g7015[published Online First: Epub Date].
10. Haneef R, Lazarus C, Ravaud P, Yavchitz A, Boutron I. Interpretation of Results of Studies Evaluating an Intervention Highlighted in Google Health News: A Cross-Sectional Study of News. *PLoS ONE* 2015;**10**(10):e0140889 doi: 10.1371/journal.pone.0140889[published Online First: Epub Date].
11. Grilli R, Ramsay C, Minozzi S. Mass media interventions: effects on health services utilisation. *Cochrane Database of Systematic Reviews* 2002; (1). <http://onlinelibrary.wiley.com/doi/10.1002/14651858.CD000389/abstract>.
12. Haas JS, Kaplan CP, Gerstenberger EP, Kerlikowske K. Changes in the Use of Postmenopausal Hormone Therapy after the Publication of Clinical Trial Results. *Annals of Internal Medicine* 2004;**140**(3):184-88 doi: 10.7326/0003-4819-140-3-200402030-00009[published Online First: Epub Date].
13. Boutron I, Altman DG, Hopewell S, Vera-Badillo F, Tannock I, Ravaud P. Impact of Spin in the Abstracts of Articles Reporting Results of Randomized Controlled Trials in the Field of Cancer: The SPIIN Randomized Controlled Trial. *Journal of Clinical Oncology* 2014;**32**(36):4120-26
14. Kimmerle J, Flemming D, Feinkohl I, Cress U. How Laypeople Understand the Tentativeness of Medical Research News in the Media. *Science Communication* 2015;**37**(2):173-89 doi: doi:10.1177/1075547014556541[published Online First: Epub Date].
15. Feinkohl I, Flemming D, Cress U, Kimmerle J. The Impact of Personality Factors and Preceding User Comments on the Processing of Research Findings on Deep Brain Stimulation: A Randomized Controlled Experiment in a Simulated Online Forum. *J Med Internet Res* 2016;**18**(3):e59 doi: 10.2196/jmir.4382[published Online First: Epub Date].
16. Boutron I, Dutton S, Ravaud P, Altman DG. REporting and interpretation of randomized controlled trials with statistically nonsignificant results for primary outcomes. *JAMA* 2010;**303**(20):2058-64 doi: 10.1001/jama.2010.651[published Online First: Epub Date].
17. Ochodo EA, Haan MCd, Reitsma JB, Hooft L, Bossuyt PM, Leeflang MMG. Overinterpretation and Misreporting of Diagnostic Accuracy Studies: Evidence of "Spin". *Radiology* 2013;**267**(2):581-88 doi: 10.1148/radiol.12120527[published Online First: Epub Date].

18. Latronico N, Metelli M, Turin M, Piva S, Rasulo FA, Minelli C. Quality of reporting of randomized controlled trials published in Intensive Care Medicine from 2001 to 2010. *Intensive Care Medicine* 2013;**39**(8):1386-95 doi: 10.1007/s00134-013-2947-3[published Online First: Epub Date]].
19. Lazarus C, Haneef R, Ravaud P, Boutron I. Classification and prevalence of spin in abstracts of non-randomized studies evaluating an intervention. *BMC Medical Research Methodology* 2015;**15**(1):1-8 doi: 10.1186/s12874-015-0079-x[published Online First: Epub Date]].
20. Downing NS, Cheng T, Krumholz HM, Shah ND, Ross JS. Descriptions and interpretations of the accord-lipid trial in the news and biomedical literature: A cross-sectional analysis. *JAMA Internal Medicine* 2014;**174**(7):1176-82 doi: 10.1001/jamainternmed.2014.1371[published Online First: Epub Date]].
21. Yavchitz A, Ravaud P, Altman DG, et al. A new classification of spin in systematic reviews and meta-analyses was developed and ranked according to the severity. *Journal of Clinical Epidemiology* 2016;**75**:56-65 doi: <http://dx.doi.org/10.1016/j.jclinepi.2016.01.020>[published Online First: Epub Date]].
22. Lazarus C, Haneef R, Ravaud P, Hopewell S, Altman DG, Boutron I. Peer reviewers identified spin in manuscripts of nonrandomized studies assessing therapeutic interventions, but their impact on spin in abstract conclusions was limited. *Journal of Clinical Epidemiology* 2016;**77**:44-51 doi: <http://dx.doi.org/10.1016/j.jclinepi.2016.04.012>[published Online First: Epub Date]].
23. Chan A-W, Tetzlaff JM, Gøtzsche PC, et al. SPIRIT 2013 explanation and elaboration: guidance for protocols of clinical trials. *BMJ : British Medical Journal* 2013;**346** doi: 10.1136/bmj.e7586[published Online First: Epub Date]].
24. Shamseer L, Moher D, Clarke M, et al. Preferred reporting items for systematic review and meta-analysis protocols (PRISMA-P) 2015: elaboration and explanation. *BMJ : British Medical Journal* 2015;**349** doi: 10.1136/bmj.g7647[published Online First: Epub Date]].
25. Altmetric. <http://www.altmetric.com/about-altmetrics/altmetric-details-page/>. 2012
26. Cummings P, Rivara FP. SPin and boasting in research articles. *Archives of Pediatrics & Adolescent Medicine* 2012;**166**(12):1099-100 doi: 10.1001/archpediatrics.2012.1461[published Online First: Epub Date]].
27. Cofield SS, Corona RV, Allison DB. Use of Causal Language in Observational Studies of Obesity and Nutrition. *Obesity Facts* 2010;**3**(6):353-56



**Figure 1: Series of 16 RCTs that will be included in the prospective meta-analysis**

Each RCT will explore the interpretation of news items reporting 4 study designs: 1) pre-clinical studies, 2) phase I/II trials (non-randomized), 3) RCTs, and 4) observational studies. Each RCT will target 4 types of populations: 1) French-speaking patients, 2) French-speaking general public, 3) English-speaking patients, and 4) English-speaking general public.

For peer review only

**Table 1: Guidelines to remove spin**

| Spin                                                                                                                         | Interventions/modifications                                                                                                                               |
|------------------------------------------------------------------------------------------------------------------------------|-----------------------------------------------------------------------------------------------------------------------------------------------------------|
| <b>Spin in headline</b>                                                                                                      | Delete the misleading information and report the appropriate information                                                                                  |
| <b>Spin in text</b>                                                                                                          |                                                                                                                                                           |
| <b>Misleading reporting</b>                                                                                                  |                                                                                                                                                           |
| • Misleading reporting of study design                                                                                       | Report the appropriate study design                                                                                                                       |
| • Not reporting study population if an animal study                                                                          | Report animal study subjects                                                                                                                              |
| • Selective reporting of outcomes                                                                                            | Report the results for all primary outcomes.                                                                                                              |
| • Not reporting adverse events                                                                                               | Report adverse events when higher in one group<br>[We considered reporting more frequent and serious adverse events related to treatment primarily.]      |
| • Use of linguistic spin                                                                                                     | Delete linguistic spin                                                                                                                                    |
| • Not reporting study limitations and caution specific to study design                                                       | Report the study limitations and cautions. The cautions with standardized text are described in table 2.                                                  |
| <b>Misleading interpretation</b>                                                                                             |                                                                                                                                                           |
| • Claiming a beneficial effect of intervention despite statistically non-significant results                                 | Delete this spin and use the generic wording, such as [Treatment A was not more effective on “primary outcome” than the comparator B in patients with...] |
| • Claiming an equivalent beneficial effect of intervention despite statistically non-significant results in superiority RCTs |                                                                                                                                                           |
| • Claiming the treatment is safe despite statistically non-significant results in treatment and comparison groups            | Delete this spin; reword and provide the appropriate information when needed.                                                                             |
| • Claiming safety despite adverse events                                                                                     |                                                                                                                                                           |
| • Claiming a causal effect despite non-randomized study design                                                               |                                                                                                                                                           |
| • Claiming a beneficial effect despite small sample size not reported                                                        |                                                                                                                                                           |
| • Claiming a beneficial effect despite lack of comparator                                                                    |                                                                                                                                                           |
| • Focus on p-value instead of magnitude of the effect (effect size)                                                          |                                                                                                                                                           |
| <b>Misleading extrapolation</b>                                                                                              |                                                                                                                                                           |
| • Animal study results to human application                                                                                  | Delete the inappropriate extrapolation                                                                                                                    |
| • Preliminary study results to clinical application                                                                          |                                                                                                                                                           |
| • Study outcomes to other outcomes for the disease                                                                           |                                                                                                                                                           |
| • Study intervention to a different intervention                                                                             |                                                                                                                                                           |
| • Study participants to a larger or different population                                                                     |                                                                                                                                                           |
| • Inappropriate implication for clinical or daily use                                                                        | Delete the statement and clearly report the immediate unavailability in clinical practice                                                                 |
| <b>Author's/expert's statement (interview)</b>                                                                               |                                                                                                                                                           |
|                                                                                                                              | Delete the spin in the statement                                                                                                                          |
|                                                                                                                              | Report the caution or recommendation by study authors, reported in the relevant article when available.                                                   |

**Table 2: Reporting of cautions with standardized wording**

| Study design                                                                            | Standardized text                                                                                                                                                                 |
|-----------------------------------------------------------------------------------------|-----------------------------------------------------------------------------------------------------------------------------------------------------------------------------------|
| <ul style="list-style-type: none"> <li>Animal or laboratory study</li> </ul>            | <p>“The study was based on animals; it is impossible to know whether this treatment will work on humans or not.”</p>                                                              |
| <ul style="list-style-type: none"> <li>Small study</li> </ul>                           | <p>“These results are based on a small study; larger studies are needed to understand whether the treatment works across a large population.”</p>                                 |
| <ul style="list-style-type: none"> <li>Uncontrolled study/Lack of comparator</li> </ul> | <p>“Everyone in this study took drug X. Without investigating patients who did not take that drug, it is impossible to know whether taking drug X accounted for the outcome”.</p> |
| <ul style="list-style-type: none"> <li>Controlled but not randomized study</li> </ul>   | <p>“The study participants were not randomized. We do not know whether it was drug X or something else that really accounted for the effect observed.”</p>                        |
| <ul style="list-style-type: none"> <li>Important adverse event</li> </ul>               | <p>“The benefit observed should be weighed against the adverse effects (or other downsides such as inconvenience, cost, etc).”</p>                                                |

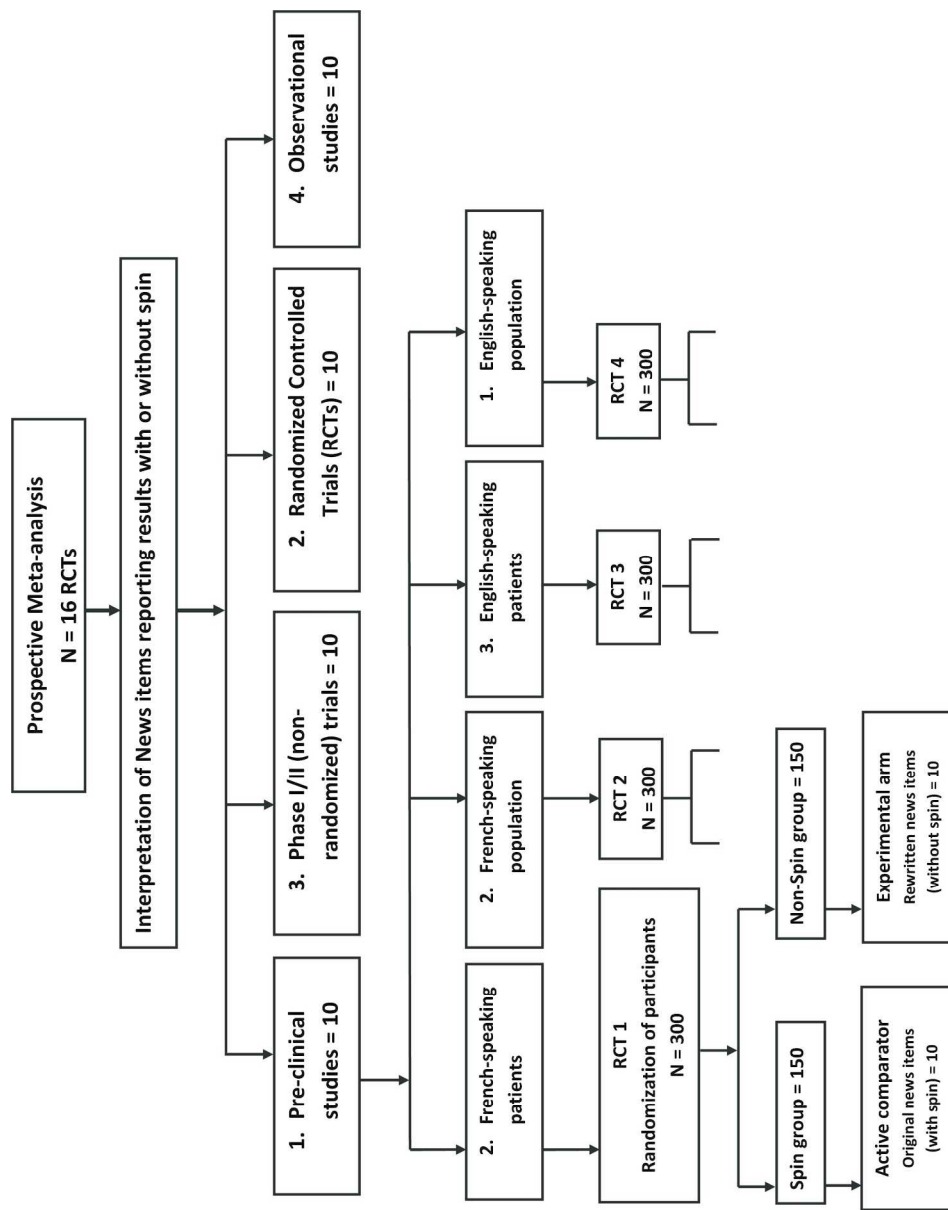

Figure 1: Series of 16 RCTs that will be included in the prospective meta-analysis

197x249mm (300 x 300 DPI)

Appendix 1: An example of a news item with and without spin

| Original News (with spin)                                                                                                                                                                                                                                                                                                                                                                                                                                                                                                                                                                                                                                                                                                                                                                                                                                                                                                                                                                                                                                                                                                                                   | Rewritten News (without spin)                                                                                                                                                                                                                                                                                                                                                                                                                                                                                                                                                                                                                                                                                                                                                                                                                                                                                                                                                                                                                                                                                                                                                                                                                                                                                                                                                                                                                                                                                                                                                                                                                                                                                                       |
|-------------------------------------------------------------------------------------------------------------------------------------------------------------------------------------------------------------------------------------------------------------------------------------------------------------------------------------------------------------------------------------------------------------------------------------------------------------------------------------------------------------------------------------------------------------------------------------------------------------------------------------------------------------------------------------------------------------------------------------------------------------------------------------------------------------------------------------------------------------------------------------------------------------------------------------------------------------------------------------------------------------------------------------------------------------------------------------------------------------------------------------------------------------|-------------------------------------------------------------------------------------------------------------------------------------------------------------------------------------------------------------------------------------------------------------------------------------------------------------------------------------------------------------------------------------------------------------------------------------------------------------------------------------------------------------------------------------------------------------------------------------------------------------------------------------------------------------------------------------------------------------------------------------------------------------------------------------------------------------------------------------------------------------------------------------------------------------------------------------------------------------------------------------------------------------------------------------------------------------------------------------------------------------------------------------------------------------------------------------------------------------------------------------------------------------------------------------------------------------------------------------------------------------------------------------------------------------------------------------------------------------------------------------------------------------------------------------------------------------------------------------------------------------------------------------------------------------------------------------------------------------------------------------|
| <p><b>Now, 'sticky balls' that can prevent cancer spread</b></p> <p>Researchers have developed cancer-killing "sticky balls," that can destroy tumour cells in the blood and may prevent cancer spread. The most dangerous and deadly stage of a tumour is when it spreads around the body. Scientists at Cornell University, in the US, have designed nanoparticles that stay in the bloodstream and kill migrating cancer cells on contact, the BBC reported. They said the impact was "dramatic" but there was "a lot more work to be done". The team at Cornell attached a cancer-killing protein called Trail, which has already been used in cancer trials, and other sticky proteins to tiny spheres or nanoparticles. When these sticky spheres were injected into the blood, they latched on to white blood cells. Tests showed that in the rough and tumble of the bloodstream, the white blood cells would bump into any tumour cells which had broken off the main tumour and were trying to spread. The research showed the resulting contact with the Trail protein then triggered the death of the tumour cells.</p> <p>Word count = 169</p> | <p><del>Now, 's</del><b>Sticky balls' that can <del>can</del> may prevent cancer spread in mice</b></p> <p>Researchers <del>have</del> <b>are</b> developed <del>ing</del> cancer-killing "sticky balls," that <del>can</del> <b>may</b> destroy tumour cells in the blood <b>of mice</b> and <del>may prevent cancer spread</del>. The most dangerous and deadly stage of a tumour is when it spreads around the body. Scientists at Cornell University, in the US, have designed nanoparticles that stay in the bloodstream and <b>may</b> kill migrating cancer cells on contact, the BBC reported. <del>They said the impact was "dramatic" but there was "a lot more work to be done".</del> <b>The biomedical engineers tested the new technology in live mice and human blood samples in cell culture.</b> The team at Cornell attached a <del>cancer-killing</del> protein called <del>Trail</del> <b>TRAIL</b>, which has already been used in cancer trials and other sticky proteins to tiny spheres or nanoparticles. <del>When these sticky spheres were injected into blood, they latched on to white blood cells.</del> Tests showed that in the rough and tumble of the bloodstream, the white blood cells would bump into any tumour cells which had broken off the main tumour and <del>were trying to spread</del> <b>bind to the TRAIL protein</b>. The research showed the resulting contact with the Trail protein then <b>may triggered result in</b> the death of the tumour cells. <b>However, it may take years to know whether this treatment will work for human or not. Indeed, less than 1% of the drugs tested on animals are approved for clinical use in patients.</b></p> <p>Word count = 188</p> |

## Appendix 2: Informed consent

### Invitation letter

**Objective:** Interpretation of health news items: an academic study

We invite you to participate in an international academic study to investigate people's understanding of health news items.

The study will require only a minimal amount of work on your part, and you will be helping to improve the reporting/communication of results related to medical research in health news for patients and the public.

Your participation would involve in reading a news item and answering five short questions about the findings in the news item. To avoid any biased interpretation, the description of the treatment and name of the study has been masked.

Your responses will be kept confidential. This study has been approved by INSERM, Institutional Review Board (IRB 00003888).

We will share with you the results of this study upon its completion.

You can complete the survey by XX

Or by copying and pasting the following link into your web browser: XX

With best wishes

Pr Isabelle Boutron (Paris Descartes University, INSERM UMR 1153, France)

Romana Haneef (Paris Descartes University, INSERM UMR 1153, France)

Dr. Amélie Yavchitz (French Cochrane Center, Paris, France)

Pr Philippe Ravaud (Paris Descartes University, INSERM UMR 1153, France)

Mr. Gabriel Baron (Centre d'Épidémiologie Clinique, Hôpital Hôtel-Dieu, Paris, France)

Pr Ivan Oransky (New York University's Arthur Carter Journalism Institute, New York, USA)

Pr Gary Schwitzer (University of Minnesota, School of public health, Minnesota, USA)

If you prefer not to receive future reminders regarding this study, please click here.

1  
2  
3 **Next page**  
4

5 **Please complete some simple information about yourself**  
6  
7

8  
9  
10 Your age:

11  
12 Sex: Female Male  
13

14 Do you have a chronic health condition yes/ no (*according to the answer, the participant will be*  
15 *directed to the survey dedicated to patients or to the public*)  
16

17  
18 Where are you currently located? France/ UK/ Other European country/ USA/ Canada/ South  
19 America/ Asia/ Oceania  
20

21 How often do you read news items? Never/sometimes (once per month)/often (once per  
22 week)/daily  
23

24  
25 Do you rely on health news items to decide about your health?  
26

27 What is your primary source to obtain information related to new treatments?  
28

29 Physicians/family or friends/online health news/television/social media/other  
30  
31

32  
33  
34 **Submit**  
35  
36  
37  
38  
39  
40  
41  
42  
43  
44  
45  
46  
47  
48  
49  
50  
51  
52  
53  
54  
55  
56  
57  
58  
59  
60

1  
2  
3  
4  
5  
6  
7  
8  
9  
10  
11  
12  
13  
14  
15  
16  
17  
18  
19  
20  
21  
22  
23  
24  
25  
26  
27  
28  
29  
30  
31  
32  
33  
34  
35  
36  
37  
38  
39  
40  
41  
42  
43  
44  
45  
46  
47  
48  
49  
50  
51  
52  
53  
54  
55  
56  
57  
58  
59  
60

Next page

This news item describes a study evaluating a treatment published in a peer-reviewed journal.

### Insertion of the news items

Based on the information reported in the news, please answer the following questions about the treatment:

1. What do you think is the probability that “treatment X” would be beneficial to patients? (scale, 0 [very unlikely] to 10 [very likely]) (Primary outcome)
2. What do you think is the size of the potential benefit for patients? (scale, [none, small, moderate or large])
3. How safe do you think that this treatment X would be for patients? (scale, 0 [very unsafe] to 10 [very safe])
4. Do you think this treatment should be offered to patients in the short term? (scale, 0 [absolutely no] to 10 [absolutely yes])
5. Do you think this treatment will make a difference in the existing clinical practice? (scale, 0 [absolutely no] to 10 [absolutely yes])

Do you have any comments?

Write your comment here ...

**Submit**

Thank you very much for your participation in this study.

If you wish to receive the results of this study, please indicate your email address here.



**PRISMA-P (Preferred Reporting Items for Systematic review and Meta-Analysis Protocols) 2015 checklist: recommended items to address in a systematic review protocol\***

| Section and topic                 | Item No | Checklist item                                                                                                                                                                                                                | Page# in protocol |
|-----------------------------------|---------|-------------------------------------------------------------------------------------------------------------------------------------------------------------------------------------------------------------------------------|-------------------|
| <b>ADMINISTRATIVE INFORMATION</b> |         |                                                                                                                                                                                                                               |                   |
| Title:                            |         |                                                                                                                                                                                                                               | 1                 |
| Identification                    | 1a      | Identify the report as a protocol of a systematic review                                                                                                                                                                      | 1                 |
| Update                            | 1b      | If the protocol is for an update of a previous systematic review, identify as such                                                                                                                                            |                   |
| Registration                      | 2       | If registered, provide the name of the registry (such as PROSPERO) and registration number                                                                                                                                    | 2, 6, 20          |
| Authors:                          |         |                                                                                                                                                                                                                               |                   |
| Contact                           | 3a      | Provide name, institutional affiliation, e-mail address of all protocol authors; provide physical mailing address of corresponding author                                                                                     | 1                 |
| Contributions                     | 3b      | Describe contributions of protocol authors and identify the guarantor of the review                                                                                                                                           | 19                |
| Amendments                        | 4       | If the protocol represents an amendment of a previously completed or published protocol, identify as such and list changes; otherwise, state plan for documenting important protocol amendments                               | 18                |
| Support:                          |         |                                                                                                                                                                                                                               |                   |
| Sources                           | 5a      | Indicate sources of financial or other support for the review                                                                                                                                                                 | 19                |
| Sponsor                           | 5b      | Provide name for the review funder and/or sponsor                                                                                                                                                                             |                   |
| Role of sponsor or funder         | 5c      | Describe roles of funder(s), sponsor(s), and/or institution(s), if any, in developing the protocol                                                                                                                            |                   |
| <b>INTRODUCTION</b>               |         |                                                                                                                                                                                                                               |                   |
| Rationale                         | 6       | Describe the rationale for the review in the context of what is already known                                                                                                                                                 | 4                 |
| Objectives                        | 7       | Provide an explicit statement of the question(s) the review will address with reference to participants, interventions, comparators, and outcomes (PICO)                                                                      | 4                 |
| <b>METHODS</b>                    |         |                                                                                                                                                                                                                               |                   |
| Eligibility criteria              | 8       | Specify the study characteristics (such as PICO, study design, setting, time frame) and report characteristics (such as years considered, language, publication status) to be used as criteria for eligibility for the review | 5                 |
| Information sources               | 9       | Describe all intended information sources (such as electronic databases, contact with study authors, trial registers or other grey literature sources) with planned dates of coverage                                         | 6, 7              |

|                                    |     |                                                                                                                                                                                                                                                  |             |
|------------------------------------|-----|--------------------------------------------------------------------------------------------------------------------------------------------------------------------------------------------------------------------------------------------------|-------------|
| Search strategy                    | 10  | Present draft of search strategy to be used for at least one electronic database, including planned limits, such that it could be repeated                                                                                                       | 6           |
| Study records:                     |     |                                                                                                                                                                                                                                                  |             |
| Data management                    | 11a | Describe the mechanism(s) that will be used to manage records and data throughout the review                                                                                                                                                     | 7, 8        |
| Selection process                  | 11b | State the process that will be used for selecting studies (such as two independent reviewers) through each phase of the review (that is, screening, eligibility and inclusion in meta-analysis)                                                  | 6, 7        |
| Data collection process            | 11c | Describe planned method of extracting data from reports (such as piloting forms, done independently, in duplicate), any processes for obtaining and confirming data from investigators                                                           | 7, 8        |
| Data items                         | 12  | List and define all variables for which data will be sought (such as PICO items, funding sources), any pre-planned data assumptions and simplifications                                                                                          | 7, 8, 9, 10 |
| Outcomes and prioritization        | 13  | List and define all outcomes for which data will be sought, including prioritization of main and additional outcomes, with rationale                                                                                                             | 13          |
| Risk of bias in individual studies | 14  | Describe anticipated methods for assessing risk of bias of individual studies, including whether this will be done at the outcome or study level, or both; state how this information will be used in data synthesis                             | NA          |
| Data synthesis                     | 15a | Describe criteria under which study data will be quantitatively synthesised                                                                                                                                                                      | 12,13       |
|                                    | 15b | If data are appropriate for quantitative synthesis, describe planned summary measures, methods of handling data and methods of combining data from studies, including any planned exploration of consistency (such as $I^2$ , Kendall's $\tau$ ) | 13, 14      |
|                                    | 15c | Describe any proposed additional analyses (such as sensitivity or subgroup analyses, meta-regression)                                                                                                                                            | 14          |
|                                    | 15d | If quantitative synthesis is not appropriate, describe the type of summary planned                                                                                                                                                               |             |
| Meta-bias(es)                      | 16  | Specify any planned assessment of meta-bias(es) (such as publication bias across studies, selective reporting within studies)                                                                                                                    | NA          |
| Confidence in cumulative evidence  | 17  | Describe how the strength of the body of evidence will be assessed (such as GRADE)                                                                                                                                                               | 16          |

**\* It is strongly recommended that this checklist be read in conjunction with the PRISMA-P Explanation and Elaboration (cite when available) for important clarification on the items. Amendments to a review protocol should be tracked and dated. The copyright for PRISMA-P (including checklist) is held by the PRISMA-P Group and is distributed under a Creative Commons Attribution Licence 4.0.**

*From: Shamseer L, Moher D, Clarke M, Ghersi D, Liberati A, Petticrew M, Shekelle P, Stewart L, PRISMA-P Group. Preferred reporting items for systematic review and meta-analysis protocols (PRISMA-P) 2015: elaboration and explanation. BMJ. 2015 Jan 2;349(jan02 1):g7647.*

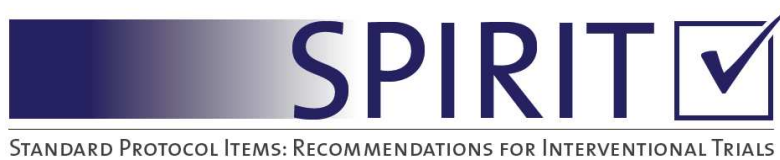

SPIRIT 2013 Checklist: Recommended items to address in a clinical trial protocol and related documents\*

| Section/item                      | Item No | Description                                                                                                                                                                                                                                                                              | Page# in protocol |
|-----------------------------------|---------|------------------------------------------------------------------------------------------------------------------------------------------------------------------------------------------------------------------------------------------------------------------------------------------|-------------------|
| <b>Administrative information</b> |         |                                                                                                                                                                                                                                                                                          |                   |
| Title                             | 1       | Descriptive title identifying the study design, population, interventions, and, if applicable, trial acronym:                                                                                                                                                                            | 1                 |
| Trial registration                | 2a      | Trial identifier and registry name. If not yet registered, name of intended registry                                                                                                                                                                                                     |                   |
|                                   | 2b      | All items from the World Health Organization Trial Registration Data Set                                                                                                                                                                                                                 |                   |
| Protocol version                  | 3       | Date and version identifier                                                                                                                                                                                                                                                              |                   |
| Funding                           | 4       | Sources and types of financial, material, and other support                                                                                                                                                                                                                              | 19                |
| Roles and responsibilities        | 5a      | Names, affiliations, and roles of protocol contributors                                                                                                                                                                                                                                  | 1 & 19            |
|                                   | 5b      | Name and contact information for the trial sponsor                                                                                                                                                                                                                                       | 1                 |
|                                   | 5c      | Role of study sponsor and funders, if any, in study design; collection, management, analysis, and interpretation of data; writing of the report; and the decision to submit the report for publication, including whether they will have ultimate authority over any of these activities |                   |
|                                   | 5d      | Composition, roles, and responsibilities of the coordinating centre, steering committee, endpoint adjudication committee, data management team, and other individuals or groups overseeing the trial, if applicable (see Item 21a for data monitoring committee)                         |                   |
| <b>Introduction</b>               |         |                                                                                                                                                                                                                                                                                          | 4                 |

|    |                                                           |     |                                                            |      |
|----|-----------------------------------------------------------|-----|------------------------------------------------------------|------|
| 1  |                                                           |     |                                                            |      |
| 2  | Background                                                | 6a  | Description of research question and justification for     | 4    |
| 3  | d and                                                     |     | undertaking the trial, including summary of relevant       |      |
| 4  | rationale                                                 |     | studies (published and unpublished) examining              |      |
| 5  |                                                           |     | benefits and harms for each intervention                   |      |
| 6  |                                                           |     |                                                            |      |
| 7  |                                                           | 6b  | Explanation for choice of comparators                      | 6,10 |
| 8  |                                                           |     |                                                            |      |
| 9  | Objectives                                                | 7   | Specific objectives or hypotheses                          | 4    |
| 10 |                                                           |     |                                                            |      |
| 11 | Trial                                                     | 8   | Description of trial design including type of trial (eg,   | 5    |
| 12 | design                                                    |     | parallel group, crossover, factorial, single group),       |      |
| 13 |                                                           |     | allocation ratio, and framework (eg, superiority,          |      |
| 14 |                                                           |     | equivalence, noninferiority, exploratory)                  |      |
| 15 |                                                           |     |                                                            |      |
| 16 |                                                           |     |                                                            |      |
| 17 | <b>Methods: Participants, interventions, and outcomes</b> |     |                                                            |      |
| 18 |                                                           |     |                                                            |      |
| 19 | Study                                                     | 9   | Description of study settings (eg, community clinic,       | 5    |
| 20 | setting                                                   |     | academic hospital) and list of countries where data will   |      |
| 21 |                                                           |     | be collected. Reference to where list of study sites can   |      |
| 22 |                                                           |     | be obtained                                                |      |
| 23 |                                                           |     |                                                            |      |
| 24 | Eligibility                                               | 10  | Inclusion and exclusion criteria for participants. If      | 11   |
| 25 | criteria                                                  |     | applicable, eligibility criteria for study centres and     |      |
| 26 |                                                           |     | individuals who will perform the interventions (eg,        |      |
| 27 |                                                           |     | surgeons, psychotherapists)                                |      |
| 28 |                                                           |     |                                                            |      |
| 29 |                                                           |     |                                                            |      |
| 30 | Interventio                                               | 11a | Interventions for each group with sufficient detail to     | 12   |
| 31 | ns                                                        |     | allow replication, including how and when they will be     |      |
| 32 |                                                           |     | administered                                               |      |
| 33 |                                                           |     |                                                            |      |
| 34 |                                                           | 11b | Criteria for discontinuing or modifying allocated          |      |
| 35 |                                                           |     | interventions for a given trial participant (eg, drug dose |      |
| 36 |                                                           |     | change in response to harms, participant request, or       |      |
| 37 |                                                           |     | improving/worsening disease)                               |      |
| 38 |                                                           |     |                                                            |      |
| 39 |                                                           |     |                                                            |      |
| 40 |                                                           | 11c | Strategies to improve adherence to intervention            |      |
| 41 |                                                           |     | protocols, and any procedures for monitoring               |      |
| 42 |                                                           |     | adherence (eg, drug tablet return, laboratory tests)       |      |
| 43 |                                                           |     |                                                            |      |
| 44 |                                                           | 11d | Relevant concomitant care and interventions that are       |      |
| 45 |                                                           |     | permitted or prohibited during the trial                   |      |
| 46 |                                                           |     |                                                            |      |
| 47 | Outcomes                                                  | 12  | Primary, secondary, and other outcomes, including the      | 13   |
| 48 |                                                           |     | specific measurement variable (eg, systolic blood          |      |
| 49 |                                                           |     | pressure), analysis metric (eg, change from baseline,      |      |
| 50 |                                                           |     | final value, time to event), method of aggregation (eg,    |      |
| 51 |                                                           |     | median, proportion), and time point for each outcome.      |      |
| 52 |                                                           |     | Explanation of the clinical relevance of chosen efficacy   |      |
| 53 |                                                           |     | and harm outcomes is strongly recommended                  |      |
| 54 |                                                           |     |                                                            |      |
| 55 |                                                           |     |                                                            |      |
| 56 |                                                           |     |                                                            |      |
| 57 |                                                           |     |                                                            |      |
| 58 |                                                           |     |                                                            |      |
| 59 |                                                           |     |                                                            |      |
| 60 |                                                           |     |                                                            |      |

|    |             |    |                                                         |    |
|----|-------------|----|---------------------------------------------------------|----|
| 1  |             |    |                                                         |    |
| 2  | Participant | 13 | Time schedule of enrolment, interventions (including    | 15 |
| 3  | timeline    |    | any run-ins and washouts), assessments, and visits for  |    |
| 4  |             |    | participants. A schematic diagram is highly             |    |
| 5  |             |    | recommended (see Figure)                                |    |
| 6  |             |    |                                                         |    |
| 7  | Sample      | 14 | Estimated number of participants needed to achieve      | 14 |
| 8  | size        |    | study objectives and how it was determined, including   |    |
| 9  |             |    | clinical and statistical assumptions supporting any     |    |
| 10 |             |    | sample size calculations                                |    |
| 11 |             |    |                                                         |    |
| 12 | Recruitme   | 15 | Strategies for achieving adequate participant enrolment | 11 |
| 13 | nt          |    | to reach target sample size                             |    |
| 14 |             |    |                                                         |    |

### Methods: Assignment of interventions (for controlled trials)

#### Allocation:

|    |           |     |                                                           |    |
|----|-----------|-----|-----------------------------------------------------------|----|
| 17 |           |     |                                                           |    |
| 18 |           |     |                                                           |    |
| 19 |           |     |                                                           |    |
| 20 | Sequen    | 16a | Method of generating the allocation sequence (eg,         | 12 |
| 21 | ce        |     | computer-generated random numbers), and list of any       |    |
| 22 | generati  |     | factors for stratification. To reduce predictability of a |    |
| 23 | on        |     | random sequence, details of any planned restriction       |    |
| 24 |           |     | (eg, blocking) should be provided in a separate           |    |
| 25 |           |     | document that is unavailable to those who enrol           |    |
| 26 |           |     | participants or assign interventions                      |    |
| 27 |           |     |                                                           |    |
| 28 |           |     |                                                           |    |
| 29 | Allocati  | 16b | Mechanism of implementing the allocation sequence         | 12 |
| 30 | on        |     | (eg, central telephone; sequentially numbered, opaque,    |    |
| 31 | conceal   |     | sealed envelopes), describing any steps to conceal the    |    |
| 32 | ment      |     | sequence until interventions are assigned                 |    |
| 33 | mechan    |     |                                                           |    |
| 34 | ism       |     |                                                           |    |
| 35 |           |     |                                                           |    |
| 36 |           |     |                                                           |    |
| 37 | Implem    | 16c | Who will generate the allocation sequence, who will       | 12 |
| 38 | entation  |     | enrol participants, and who will assign participants to   |    |
| 39 |           |     | interventions                                             |    |
| 40 |           |     |                                                           |    |
| 41 | Blinding  | 17a | Who will be blinded after assignment to interventions     | 12 |
| 42 | (masking) |     | (eg, trial participants, care providers, outcome          |    |
| 43 |           |     | assessors, data analysts), and how                        |    |
| 44 |           |     |                                                           |    |
| 45 |           | 17b | If blinded, circumstances under which unblinding is       |    |
| 46 |           |     | permissible, and procedure for revealing a participant's  |    |
| 47 |           |     | allocated intervention during the trial                   |    |
| 48 |           |     |                                                           |    |

### Methods: Data collection, management, and analysis 6-10

|    |             |     |                                                              |      |
|----|-------------|-----|--------------------------------------------------------------|------|
| 1  |             |     |                                                              |      |
| 2  | Data        | 18a | Plans for assessment and collection of outcome,              | 6-10 |
| 3  | collection  |     | baseline, and other trial data, including any related        |      |
| 4  | methods     |     | processes to promote data quality (eg, duplicate             |      |
| 5  |             |     | measurements, training of assessors) and a description       |      |
| 6  |             |     | of study instruments (eg, questionnaires, laboratory         |      |
| 7  |             |     | tests) along with their reliability and validity, if known.  |      |
| 8  |             |     | Reference to where data collection forms can be found,       |      |
| 9  |             |     | if not in the protocol                                       |      |
| 10 |             |     |                                                              |      |
| 11 |             | 18b | Plans to promote participant retention and complete          | 11   |
| 12 |             |     | follow-up, including list of any outcome data to be          |      |
| 13 |             |     | collected for participants who discontinue or deviate        |      |
| 14 |             |     | from intervention protocols                                  |      |
| 15 |             |     |                                                              |      |
| 16 |             |     |                                                              |      |
| 17 | Data        | 19  | Plans for data entry, coding, security, and storage,         |      |
| 18 | managem     |     | including any related processes to promote data quality      |      |
| 19 | ent         |     | (eg, double data entry; range checks for data values).       |      |
| 20 |             |     | Reference to where details of data management                |      |
| 21 |             |     | procedures can be found, if not in the protocol              |      |
| 22 |             |     |                                                              |      |
| 23 |             |     |                                                              |      |
| 24 | Statistical | 20a | Statistical methods for analysing primary and                | 14   |
| 25 | methods     |     | secondary outcomes. Reference to where other details         |      |
| 26 |             |     | of the statistical analysis plan can be found, if not in the |      |
| 27 |             |     | protocol                                                     |      |
| 28 |             |     |                                                              |      |
| 29 |             | 20b | Methods for any additional analyses (eg, subgroup and        | 10   |
| 30 |             |     | adjusted analyses)                                           |      |
| 31 |             |     |                                                              |      |
| 32 |             |     |                                                              |      |
| 33 |             | 20c | Definition of analysis population relating to protocol       |      |
| 34 |             |     | non-adherence (eg, as randomised analysis), and any          |      |
| 35 |             |     | statistical methods to handle missing data (eg, multiple     |      |
| 36 |             |     | imputation)                                                  |      |
| 37 |             |     |                                                              |      |

### Methods: Monitoring

|    |            |     |                                                          |  |
|----|------------|-----|----------------------------------------------------------|--|
| 38 |            |     |                                                          |  |
| 39 |            |     |                                                          |  |
| 40 | Data       | 21a | Composition of data monitoring committee (DMC);          |  |
| 41 | monitoring |     | summary of its role and reporting structure; statement   |  |
| 42 |            |     | of whether it is independent from the sponsor and        |  |
| 43 |            |     | competing interests; and reference to where further      |  |
| 44 |            |     | details about its charter can be found, if not in the    |  |
| 45 |            |     | protocol. Alternatively, an explanation of why a DMC is  |  |
| 46 |            |     | not needed                                               |  |
| 47 |            |     |                                                          |  |
| 48 |            |     |                                                          |  |
| 49 |            | 21b | Description of any interim analyses and stopping         |  |
| 50 |            |     | guidelines, including who will have access to these      |  |
| 51 |            |     | interim results and make the final decision to terminate |  |
| 52 |            |     | the trial                                                |  |
| 53 |            |     |                                                          |  |
| 54 |            |     |                                                          |  |
| 55 |            |     |                                                          |  |
| 56 |            |     |                                                          |  |
| 57 |            |     |                                                          |  |
| 58 |            |     |                                                          |  |
| 59 |            |     |                                                          |  |
| 60 |            |     |                                                          |  |



|    |                 |     |                                                           |
|----|-----------------|-----|-----------------------------------------------------------|
| 1  |                 |     |                                                           |
| 2  | Dissemina       | 31a | Plans for investigators and sponsor to communicate        |
| 3  | tion policy     |     | trial results to participants, healthcare professionals,  |
| 4  |                 |     | the public, and other relevant groups (eg, via            |
| 5  |                 |     | publication, reporting in results databases, or other     |
| 6  |                 |     | data sharing arrangements), including any publication     |
| 7  |                 |     | restrictions                                              |
| 8  |                 |     |                                                           |
| 9  |                 | 31b | Authorship eligibility guidelines and any intended use of |
| 10 |                 |     | professional writers                                      |
| 11 |                 |     |                                                           |
| 12 |                 | 31c | Plans, if any, for granting public access to the full     |
| 13 |                 |     | protocol, participant-level dataset, and statistical code |
| 14 |                 |     |                                                           |
| 15 |                 |     |                                                           |
| 16 | <b>Appendic</b> |     | 17                                                        |
| 17 | <b>es</b>       |     |                                                           |
| 18 |                 |     |                                                           |
| 19 | Informed        | 32  | Model consent form and other related documentation        |
| 20 | consent         |     | given to participants and authorised surrogates           |
| 21 | materials       |     |                                                           |
| 22 |                 |     | 17                                                        |
| 23 |                 |     | Appendi                                                   |
| 24 | Biological      | 33  | Plans for collection, laboratory evaluation, and storage  |
| 25 | specimens       |     | of biological specimens for genetic or molecular          |
| 26 |                 |     | analysis in the current trial and for future use in       |
| 27 |                 |     | ancillary studies, if applicable                          |
| 28 |                 |     |                                                           |

\*It is strongly recommended that this checklist be read in conjunction with the SPIRIT 2013 Explanation & Elaboration for important clarification on the items. Amendments to the protocol should be tracked and dated. The SPIRIT checklist is copyrighted by the SPIRIT Group under the Creative Commons "[Attribution-NonCommercial-NoDerivs 3.0 Unported](https://creativecommons.org/licenses/by-nc-nd/3.0/)" license.
